# Supplementary material
Source: PubMed Central journal article supplement (PMC6960695)

## Online Supplement

### Methods

Only English language articles were included, with no minimum search date through February 28, 2017. A hand search of some systematic reviews and guidelines was performed.

We used the following search terms and their corresponding Medical Subject Heading (MeSH) terms to identify the articles for each PICO.

#### PICO 1

'stroke' OR 'transient ischemic attack' OR 'TIA' OR 'cerebrovascular accident\*' OR 'CVA' OR 'cerebrovascular apoplexy' OR 'cerebrovascular infarct\*' OR 'cerebrovascular embolism' OR 'cerebrovascular disorder' OR 'brain ischemia' OR 'brain infarct\*' OR 'brain haemorrhage' OR 'wind stroke' OR 'cerebral embolism' OR 'cerebral haemorrhage' OR 'cardioembolic stroke' OR 'intracranial arteriosclerosis' OR 'hemiparesis' OR 'hemiplegia' AND 'atrial fibrillation' OR 'AF' OR 'atrial arrhythmias' OR 'nonvalvular atrial fibrillation' OR 'non-valvular atrial fibrillation' OR 'NVAf' OR 'atrial flutter' AND 'aspirin' OR 'antiplatelet therapy' OR 'dual antiplatelet therapy' OR 'DAPT' OR 'anticoagulant\*' OR 'thienopyridine derivatives' OR 'clopidogrel' OR 'ticlopidine' OR 'dipyridamole' OR 'prasugrel' OR 'terutroban' OR 'sarpogrelate' OR 'cilostazol' OR 'vitamin K antagonist\*' OR 'VKA' OR 'warfarin' OR 'phenprocoumon' OR 'acenocoumarol' OR 'flumindione' OR 'tecarfarin' OR 'direct oral anticoagulants' OR 'non-vitamin K antagonist oral anticoagulants' OR 'NOAC\*' OR 'pradaxa' OR 'apixaban' OR 'dabigatran' OR 'edoxaban' OR 'rivaroxaban' OR 'ximelagatran' OR 'Xa inhibitor\*' OR 'terutroban' OR 'triflusal' OR 'platelet aggregation inhibitor\*' AND 'randomized controlled trials' OR 'random allocation' OR 'controlled clinical trials' OR 'control groups' OR 'clinical trial\*' OR 'double-blind method' OR 'single-blind method' OR 'controlled clinical trial' OR 'random' OR 'RCT\*' OR 'controlled trial' OR 'quasi-random\*' OR 'quasi random\*' OR 'pseudo-random\*' OR 'pseudo random\*'.

#### PICO 2A

'stroke' OR 'transient ischemic attack' OR 'TIA' OR 'cerebrovascular accident\*' OR 'CVA' OR 'cerebrovascular apoplexy' OR 'cerebrovascular infarct\*' OR 'cerebrovascular embolism' OR 'cerebrovascular disorder' OR 'brain ischemia' OR 'brain infarct\*' OR 'brain haemorrhage' OR 'wind stroke' OR 'cerebral embolism' OR 'cerebral haemorrhage' OR 'cardioembolic stroke' OR 'intracranial

arteriosclerosis' OR 'hemiparesis' OR 'hemiplegia' AND 'atrial fibrillation' OR 'AF' OR 'atrial arrhythmias'  
OR 'nonvalvular atrial fibrillation' OR 'non-valvular atrial fibrillation' OR 'NVAF' OR 'atrial flutter' AND  
'aspirin' OR 'antiplatelet therapy' OR 'dual antiplatelet therapy' OR 'DAPT' OR 'anticoagulant\*' OR  
'thienopyridine derivatives' OR 'clopidogrel' OR 'ticlopidine' OR 'dipyridamole' OR 'prasugrel' OR  
'terutroban' OR 'sarpogrelate' OR 'cilostazol' OR 'vitamin K antagonist\*' OR 'VKA' OR 'warfarin' OR  
'phenprocoumon' OR 'acenocoumarol' OR 'fluindione' OR 'tecarfarin' OR 'direct oral anticoagulants' OR  
'non-vitamin K antagonist oral anticoagulants' OR 'NOAC\*' OR 'pradaxa' OR 'apixaban' OR 'dabigatran'  
OR 'edoxaban' OR 'rivaroxaban' OR 'ximelagatran' OR 'Xa inhibitor' OR 'terutroban' OR 'triflusal' OR  
'platelet aggregation inhibitor' AND 'early' OR 'late' OR 'emergent' OR 'immediate' OR 'delayed' AND  
'randomized controlled trial\*' OR 'random allocation' OR 'controlled clinical trials' OR 'control groups'  
OR 'clinical trial\*' OR 'double-blind method' OR 'single-blind method' OR 'controlled clinical trial' OR  
'random' OR 'RCT\*' OR 'controlled trial' OR 'quasi-random\*' OR 'quasi random\*' OR 'pseudo-random\*'  
OR 'pseudo random\*'.

#### PICO 2B

'stroke' OR 'transient ischemic attack' OR 'TIA' OR 'cerebrovascular accident\*' OR 'CVA' OR  
'cerebrovascular apoplexy' OR 'cerebrovascular infarct\*' OR 'cerebrovascular embolism' OR  
'cerebrovascular disorder' OR 'brain ischemia' OR 'brain infarct\*' OR 'brain haemorrhage' OR 'wind  
stroke' OR 'cerebral embolism' OR 'cerebral haemorrhage' OR 'cardioembolic stroke' OR 'intracranial  
arteriosclerosis' OR 'hemiparesis' OR 'hemiplegia' AND 'atrial fibrillation' OR 'AF' OR 'atrial arrhythmias'  
OR 'nonvalvular Atrial fibrillation' OR 'non-valvular atrial fibrillation' OR 'NVAF' OR 'atrial flutter' AND  
'heparin' OR 'Low-Molecular-Weight Heparin' OR 'LMWH' OR 'heparinoid\*' OR 'enoxaparin\*' OR  
'glycosaminoglycan\*' OR 'nadroparin\*' OR 'mesoglycan\*' OR 'tedelparin\*' OR 'certoparin' or 'tinzaparin'  
OR 'parnaparin' OR 'dalteparin' OR 'reviparin' OR 'fraxiparin\*' OR 'danaparoid' OR 'lomoparan' OR 'org  
10172' OR 'pentosan polysulfate' AND 'randomized controlled trial\*' OR 'random allocation' OR  
'controlled clinical trials' OR 'control groups' OR 'clinical trial\*' OR 'double-blind method' OR 'single-  
blind method' OR 'controlled clinical trial' OR 'random' OR 'RCT\*' OR 'controlled trial' OR 'quasi-  
random\*' OR 'quasi random\*' OR 'pseudo-random\*' OR 'pseudo random\*'.

#### PICO 3

'left atrial appendage\*' OR 'left atrium appendage\*' OR 'left auricular appendage\*' AND 'excis\*' OR  
'excision\*' OR 'occlude\*' OR 'occlusion\*' OR 'closure\*' OR 'destruction' OR 'obliterat\*' OR 'ligation\*' OR

'ligat\*' OR 'sudur\*' OR 'exclusion\*' OR 'exclud\*' OR 'appendectom\*' OR 'thoroscop\*' OR 'minithoracotom\*' OR 'mini-thoracotom\*' OR 'stapling' OR 'stapled' OR 'stapler\*' OR 'sew' OR 'sewn' OR 'oversew\*' OR 'clamp\*' OR 'clip\*' OR 'atriclip' OR 'Gillinov-Cosgrove LAA system' OR 'ligature' OR 'amputat\*' OR 'resect\*' OR 'removal' OR 'remove\*' OR 'surger\*' OR 'surgical' OR 'CABG' OR 'coronary artery bypass graft' OR 'MAZE' OR 'AVR' OR 'sternotom\*' OR 'percutaneous\*' OR 'Watchman' OR 'Watchman device' OR 'Lariat' OR 'PLAATO' OR 'Amplatzer' OR 'Coherex FlatStent' OR 'Lambre' OR 'minimal surgical' OR 'endovascular closure' OR 'Percutaneous Left Atrial appendage transcatheter occlusion' AND 'stroke' OR 'transient ischemic attack' OR 'TIA' OR 'cerebrovascular accident\*' OR 'CVA' OR 'cerebrovascular apoplexy' OR 'cerebrovascular infarct\*' OR 'cerebrovascular embolism' OR 'cerebrovascular disorder' OR 'brain ischemia' OR 'brain infarct\*' OR 'brain haemorrhage' OR 'wind stroke' OR 'cerebral embolism' OR 'cerebral haemorrhage' OR 'cardioembolic stroke' OR 'intracranial arteriosclerosis' OR 'hemiparesis' OR 'hemiplegia' AND 'atrial fibrillation' OR 'AF' OR 'atrial arrhythmias' OR 'nonvalvular atrial fibrillation' OR 'non-valvular atrial fibrillation' OR 'NVAf' OR 'atrial flutter' AND 'vitamin K antagonist\*' OR 'VKA' OR 'warfarin' OR 'phenprocoumon' OR 'acenocoumarol' OR 'fludione' OR 'tecarfarin' OR 'direct oral anticoagulants' OR 'non-vitamin K antagonist oral anticoagulants' OR 'NOAC\*' OR 'pradaxa' OR 'apixaban' OR 'dabigatran' OR 'edoxaban' OR 'rivaroxaban' OR 'ximelagatran' OR 'Xa inhibitor\*' OR 'terutroban' OR 'triflusal' AND 'randomized controlled trial\*' OR 'random allocation' OR 'controlled clinical trials' OR 'control groups' OR 'clinical trial\*' OR 'double-blind method' OR 'single-blind method' OR 'controlled clinical trial' OR 'random' OR 'RCT\*' OR 'controlled trial' OR 'quasi-random\*' OR 'quasi random\*' OR 'pseudo-random\*' OR 'pseudo random\*'.

#### PICO 4

'intracerebral haemorrhage' OR 'brain haemorrhage' OR 'cerebral haemorrhage' OR 'brain ischemia' OR 'hemorrhagic stroke' AND 'atrial fibrillation' OR 'AF' OR 'atrial arrhythmias' OR 'nonvalvular atrial fibrillation' OR 'non-valvular atrial fibrillation' OR 'NVAf' OR 'atrial flutter' AND 'vitamin K antagonist\*' OR 'VKA' OR 'warfarin' OR 'phenprocoumon' OR 'acenocoumarol' OR 'fludione' OR 'tecarfarin' OR 'direct oral anticoagulants' OR 'non-vitamin K antagonist oral anticoagulants' OR 'NOAC\*' OR 'pradaxa' OR 'apixaban' OR 'dabigatran' OR 'edoxaban' OR 'rivaroxaban' OR 'ximelagatran' OR 'Xa inhibitor' OR 'terutroban' OR 'triflusal'.

#### PICO 5A

'cognitive deficits' OR 'cognitive impairment' OR 'dementia' AND 'stroke' OR 'transient ischemic attack' OR 'TIA' OR 'cerebrovascular accident\*' OR 'CVA' OR 'cerebrovascular apoplexy' OR 'cerebrovascular infarct\*' OR 'cerebrovascular embolism' OR 'cerebrovascular disorder' OR 'brain ischemia' OR 'brain infarct\*' OR 'brain haemorrhage' OR 'wind stroke' OR 'cerebral embolism' OR 'cerebral haemorrhage' OR 'cardioembolic stroke' OR 'intracranial arteriosclerosis' OR 'hemiparesis' OR 'hemiplegia' AND 'atrial fibrillation' OR 'AF' OR 'atrial arrhythmias' OR 'nonvalvular atrial fibrillation' OR 'non-valvular atrial fibrillation' OR 'NVAf' OR 'atrial flutter' AND 'aspirin' OR 'antiplatelet' OR 'dual antiplatelet therapy' OR 'DAPT' OR 'anticoagula\*' OR 'thienopyridine derivatives' OR 'clopidogrel' OR 'ticlopidine' OR 'dipyridamole' OR 'prasugrel' OR 'terutroban' OR 'sarpogrelate' OR 'cilostazol' OR 'vitamin K antagonist\*' OR 'VKA' OR 'warfarin' OR 'phenprocoumon' OR 'acenocoumarol' OR 'fludione' OR 'tecarfarin' OR 'direct oral anticoagulants' OR 'non-vitamin K antagonist oral anticoagulants' OR 'NOAC\*' OR 'pradaxa' OR 'apixaban' OR 'dabigatran' OR 'edoxaban' OR 'rivaroxaban' OR 'ximelagatran' OR 'Xa inhibitor' OR 'terutroban' OR 'triflusal' OR 'platelet aggregation inhibitor'.

#### PICO 5B

'small vessel disease' AND 'MRI' OR 'Magnetic Resonance Imaging' OR 'Magnetic Resonance Angiography' OR 'white matter lesions' OR 'micro-bleeds' OR 'cerebral microbleeds' OR 'cerebral small vessel disease' OR 'intracerebral hemorrhage' OR 'microcirculation\*' AND 'stroke' OR 'transient ischemic attack' OR 'TIA' OR 'cerebrovascular accident\*' OR 'CVA' OR 'cerebrovascular apoplexy' OR 'cerebrovascular infarct\*' OR 'cerebrovascular embolism' OR 'cerebrovascular disorder' OR 'brain ischemia' OR 'brain infarct\*' OR 'brain haemorrhage' OR 'wind stroke' OR 'cerebral embolism' OR 'cerebral haemorrhage' OR 'cardioembolic stroke' OR 'intracranial arteriosclerosis' OR 'hemiparesis' OR 'hemiplegia' AND 'atrial fibrillation' OR 'AF' OR 'atrial arrhythmias' OR 'nonvalvular atrial fibrillation' OR 'non-valvular atrial fibrillation' OR 'NVAf' OR 'atrial flutter' AND 'aspirin' OR 'antiplatelet' OR 'dual antiplatelet therapy' OR 'DAPT' OR 'anticoagula\*' OR 'thienopyridine derivatives' OR 'clopidogrel' OR 'ticlopidine' OR 'dipyridamole' OR 'prasugrel' OR 'terutroban' OR 'sarpogrelate' OR 'cilostazol' OR 'vitamin K antagonist\*' OR 'VKA' OR 'warfarin' OR 'phenprocoumon' OR 'acenocoumarol' OR 'fludione' OR 'tecarfarin' OR 'direct oral anticoagulants' OR 'non-vitamin K antagonist oral anticoagulants' OR 'NOAC\*' OR 'pradaxa' OR 'apixaban' OR 'dabigatran' OR 'edoxaban' OR 'rivaroxaban' OR 'ximelagatran' OR 'Xa inhibitor' OR 'terutroban' OR 'triflusal' OR 'platelet aggregation inhibitor'.

PICO 5C

'atrial fibrillation' OR 'AF' OR 'atrial arrhythmias' OR 'nonvalvular atrial fibrillation' OR 'non-valvular atrial fibrillation' OR 'NVAF' OR 'atrial flutter' AND 'dabigatran' OR 'rivaroxaban' OR 'apixaban' OR 'edoxaban' OR 'NOACs' OR 'non-vitamin K antagonist oral anticoagulants' OR 'new oral anticoagulant' OR 'oral factor Xa inhibitor' OR 'Xa inhibitors' OR 'oral thrombin inhibitor' OR 'vitamin K antagonists' OR 'warfarin' OR 'anticoagulants' AND 'chronic kidney disease' OR 'renal failure' OR 'creatinine clearance' OR 'kidney function' OR 'creatinine' OR 'eGFR' OR 'renal impairment' AND 'random' OR 'random allocation' OR 'randomized' OR 'RCT' OR 'controlled trial' OR 'randomized controlled trials'.

**eTable 1. Quality of evidence grading**

| Grade           | Definition                                                                           | Criteria*               | Implication                                                                 | Symbol |
|-----------------|--------------------------------------------------------------------------------------|-------------------------|-----------------------------------------------------------------------------|--------|
|                 |                                                                                      | <b>Type of evidence</b> |                                                                             |        |
| <b>High</b>     | Confidence that true effect lies close to estimate                                   | Randomized trial        | Further research unlikely to change confidence in the effect estimate       | ⊕⊕⊕⊕   |
| <b>Moderate</b> | Moderate confidence of the effect estimate                                           |                         | Further research likely to change confidence and may change effect estimate | ⊕⊕⊕    |
| <b>Low</b>      | Limited confidence; the true effect may be substantially different from the estimate | Observational study     | Further research very likely to change confidence and effect estimate       | ⊕⊕     |
| <b>Very low</b> | Little confidence; true effect is likely to be substantially different than estimate | Other                   | Any estimate of effect is very uncertain                                    | ⊕      |

\*Decrease grade by one or two levels if limitation in study design or execution, inconsistency of results, indirectness of evidence, imprecise or sparse data, publication bias (asymmetry of a funnel plot of a meta-analysis of  $\geq 6$  studies/comparison; increase grade if strong evidence of association (relative risk  $>2$ , or  $<0.5$ ) in two or more observational studies with no plausible confounders (1 level), very strong evidence of association (relative risk  $>5$ , or  $<0.2$ ) based on direct evidence with no major threats to validity (2 levels), dose response gradient (1 level), all plausible confounders would have reduced demonstrated effect or increase the effect if no effect was observed (1 level)

## Results

eFigure 1: Medical treatment

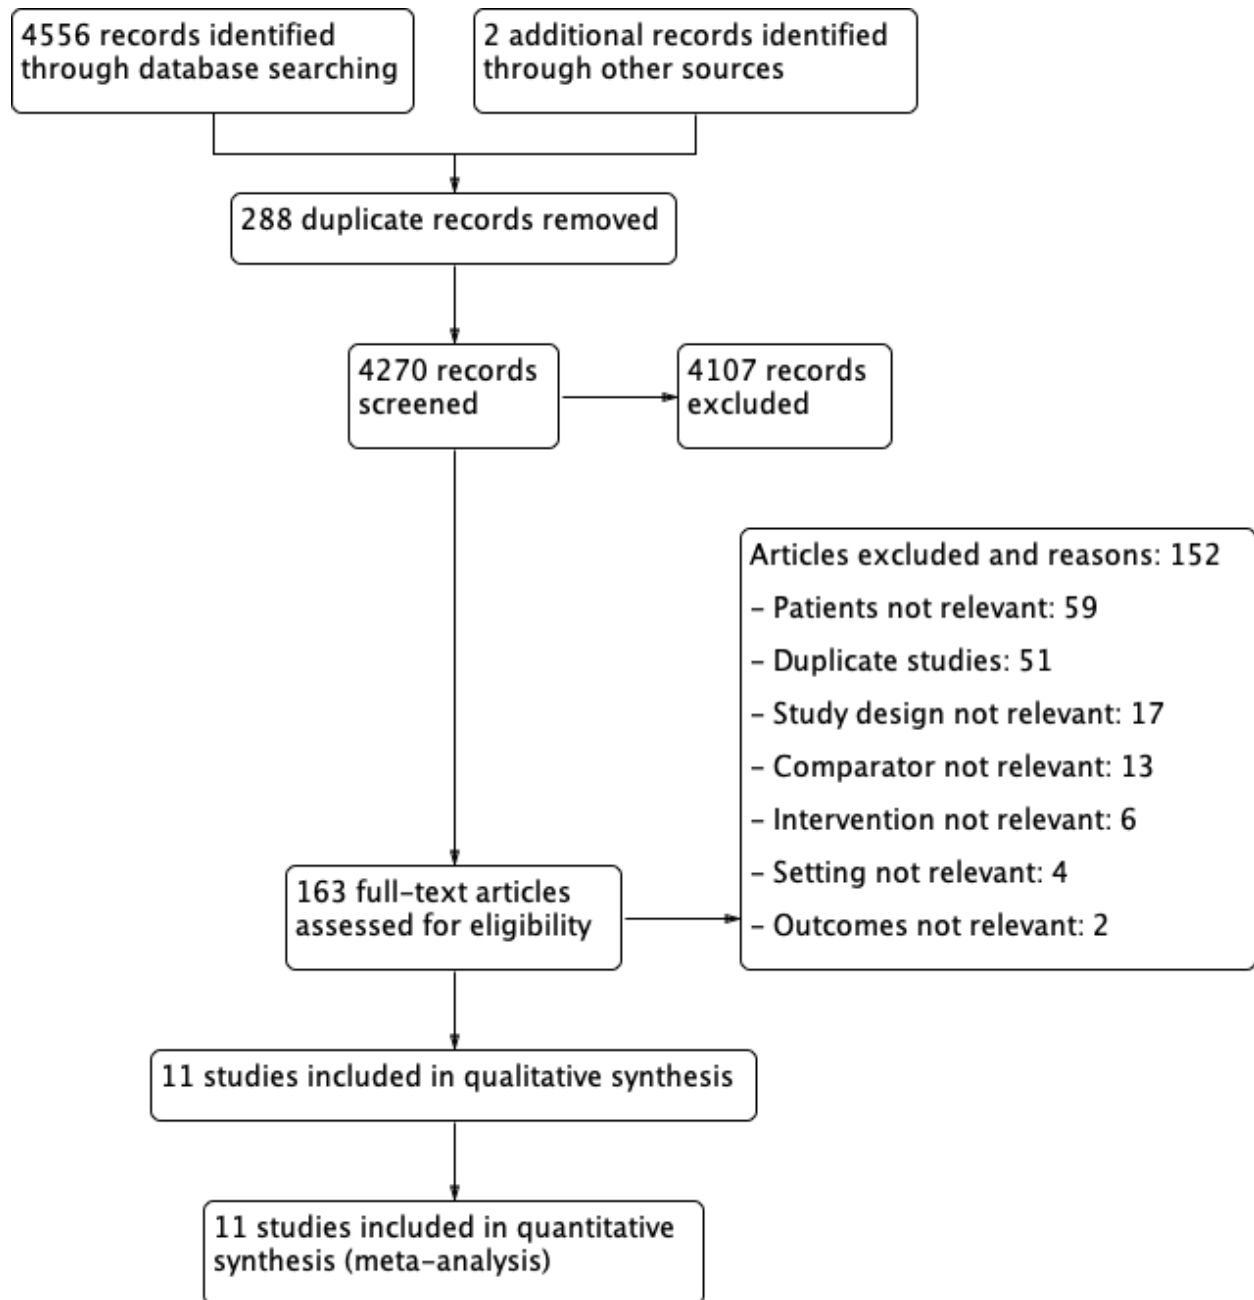

eFigure 2.1: Timing of medical treatment

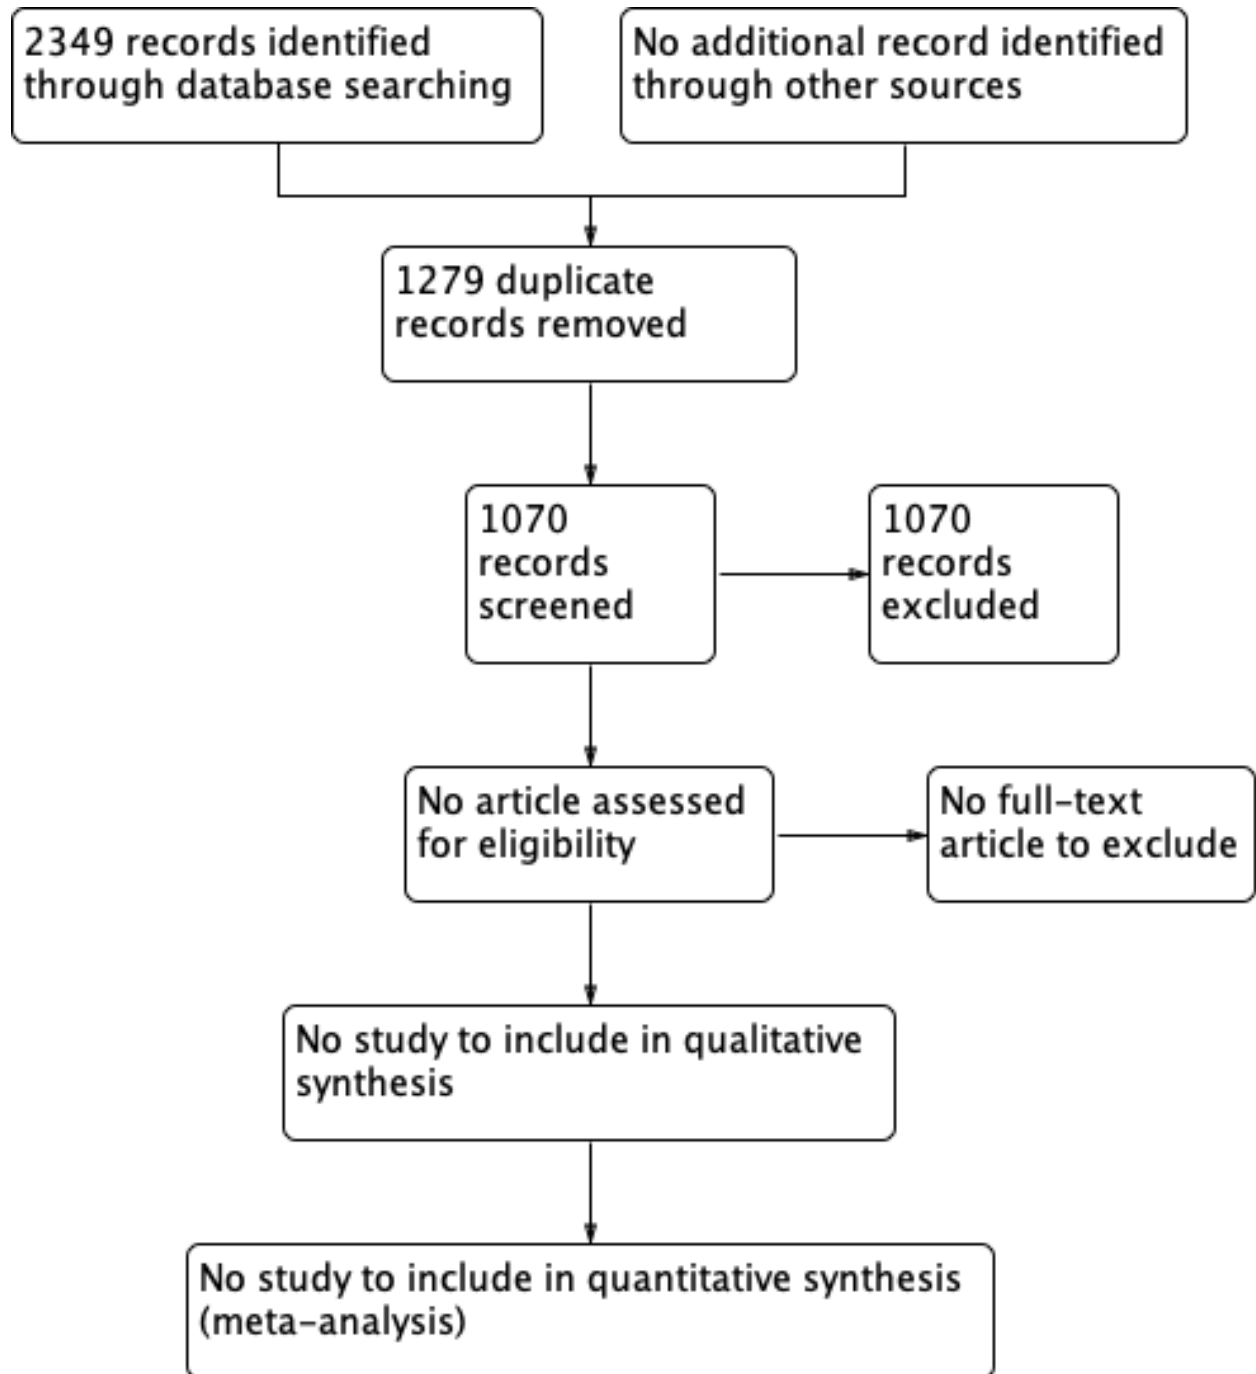



eFigure 2.2: Bridging of medical treatment

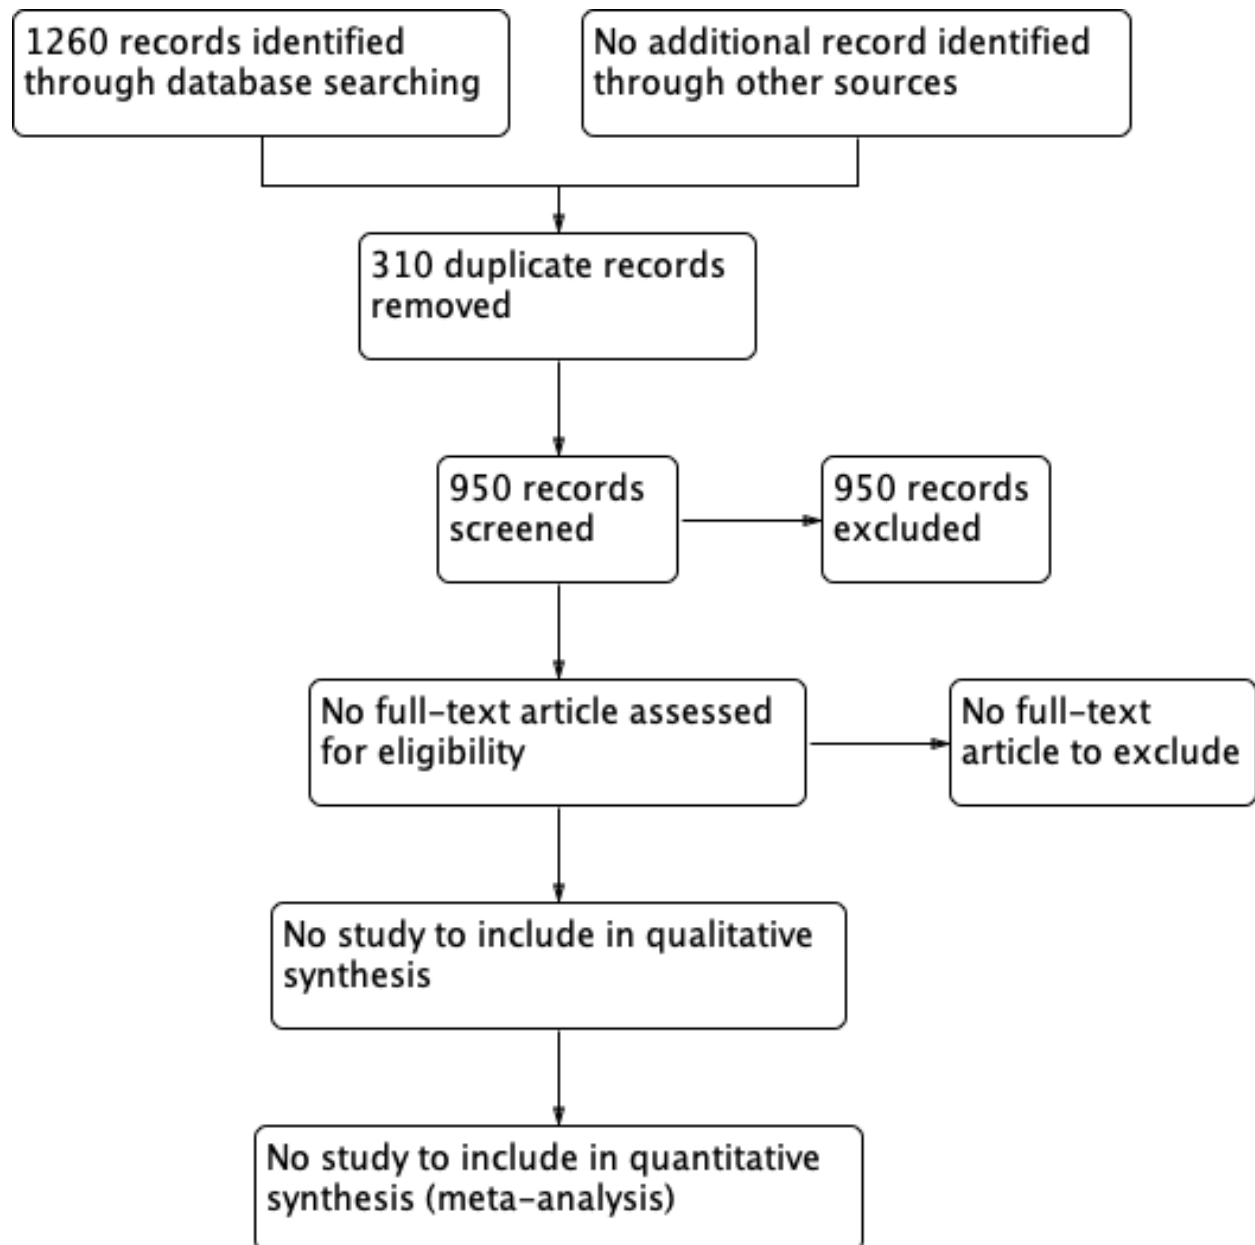

**eFigure 3: Treatment by means of occlusion of the left atrial appendage**

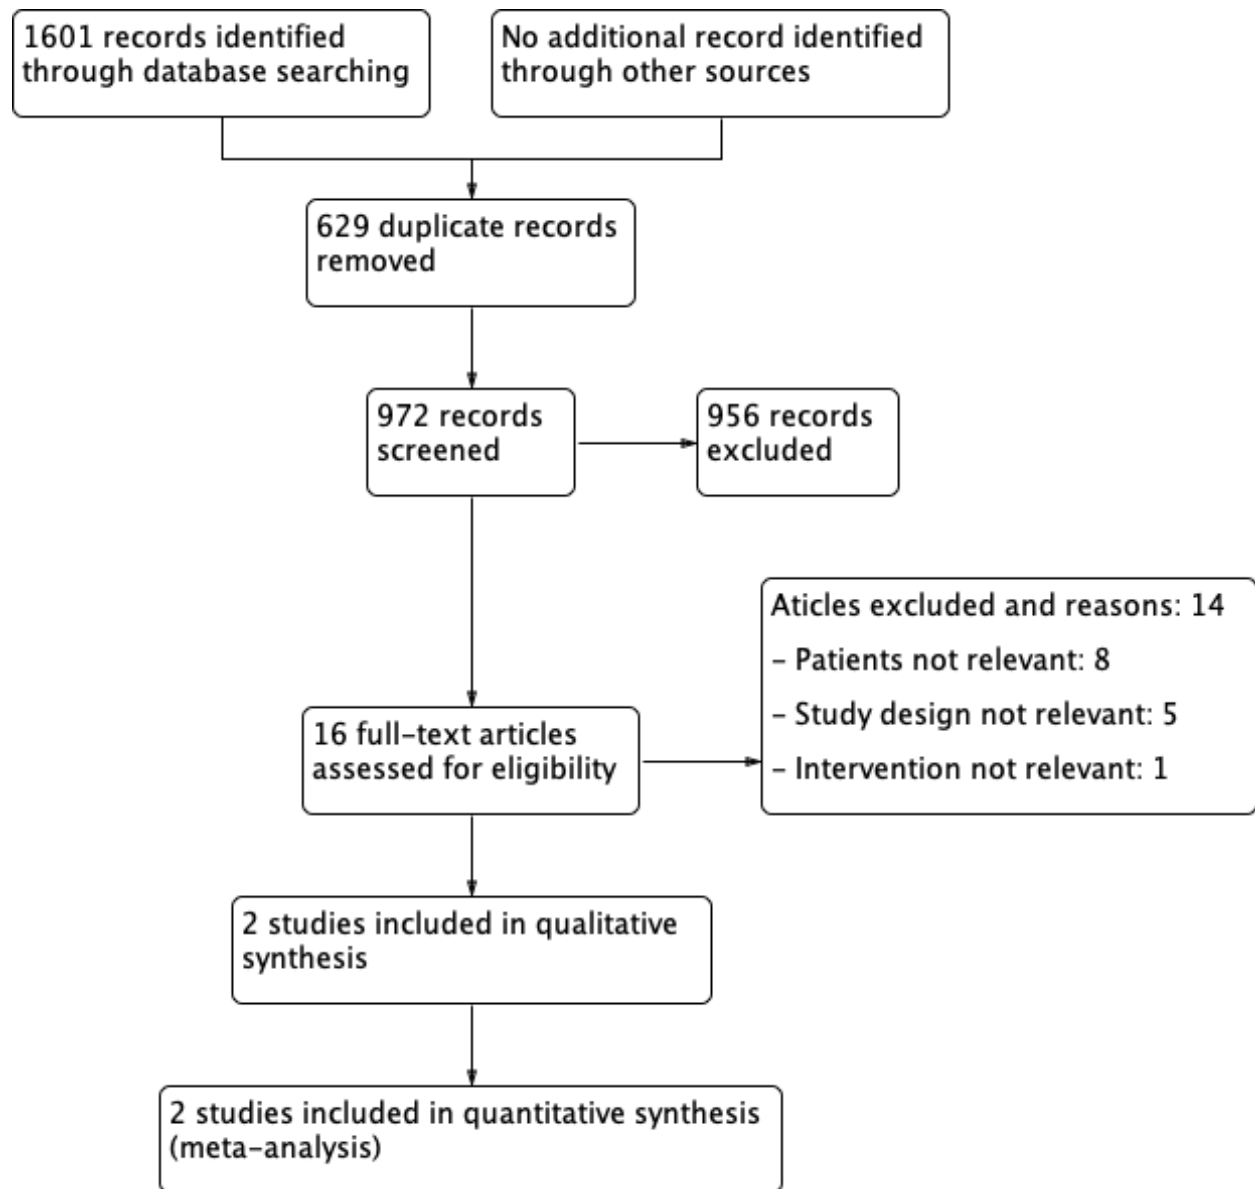

eFigure 4: (Re-)starting medical treatment in patients with previous intracerebral haemorrhage

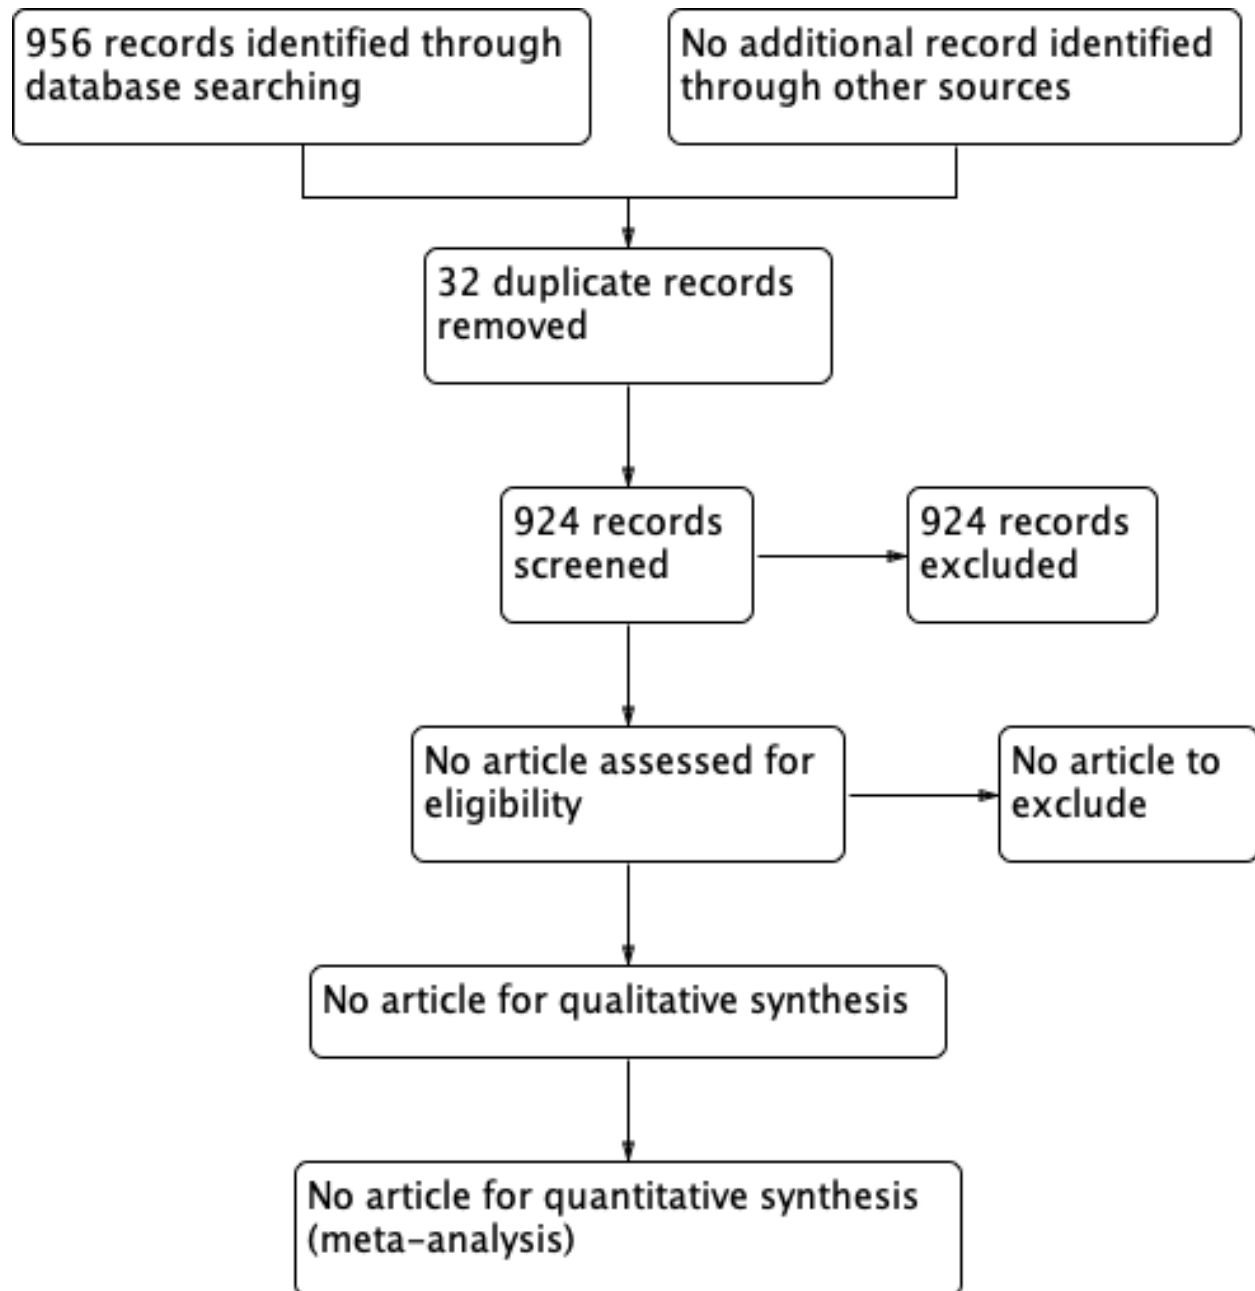

eFigure 5.2: Medical treatment in patients with cognitive deficits

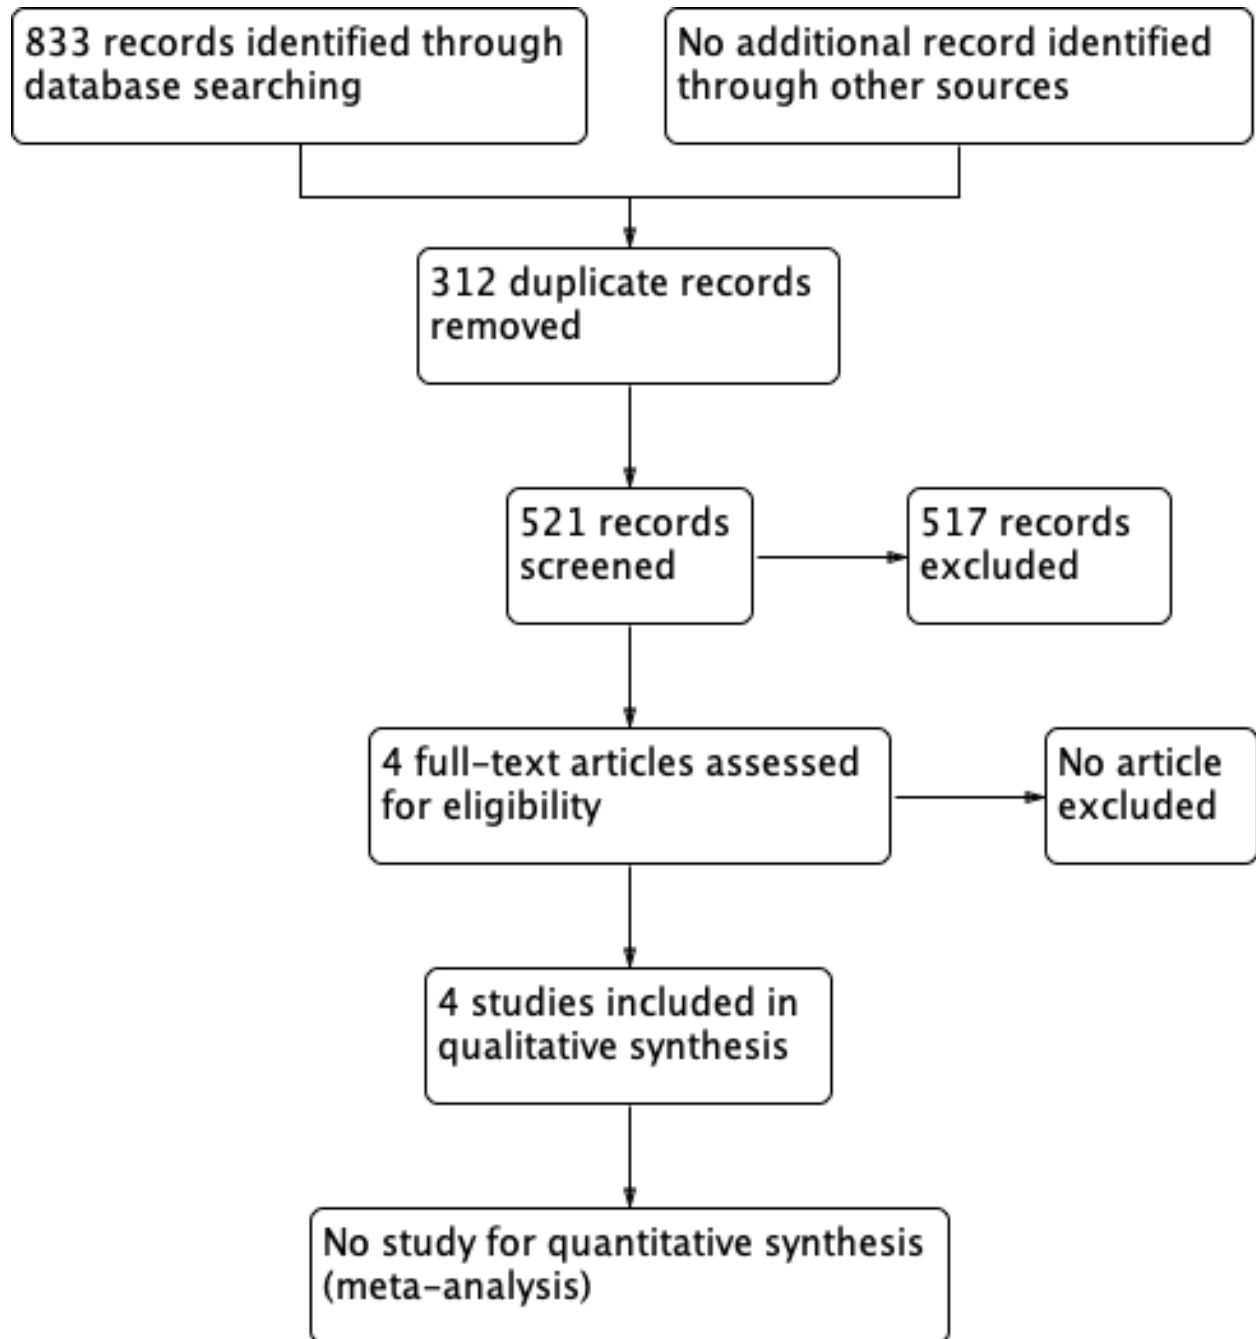

eFigure 5.3: Medical treatment in patients with signs of small vessel disease on MRI

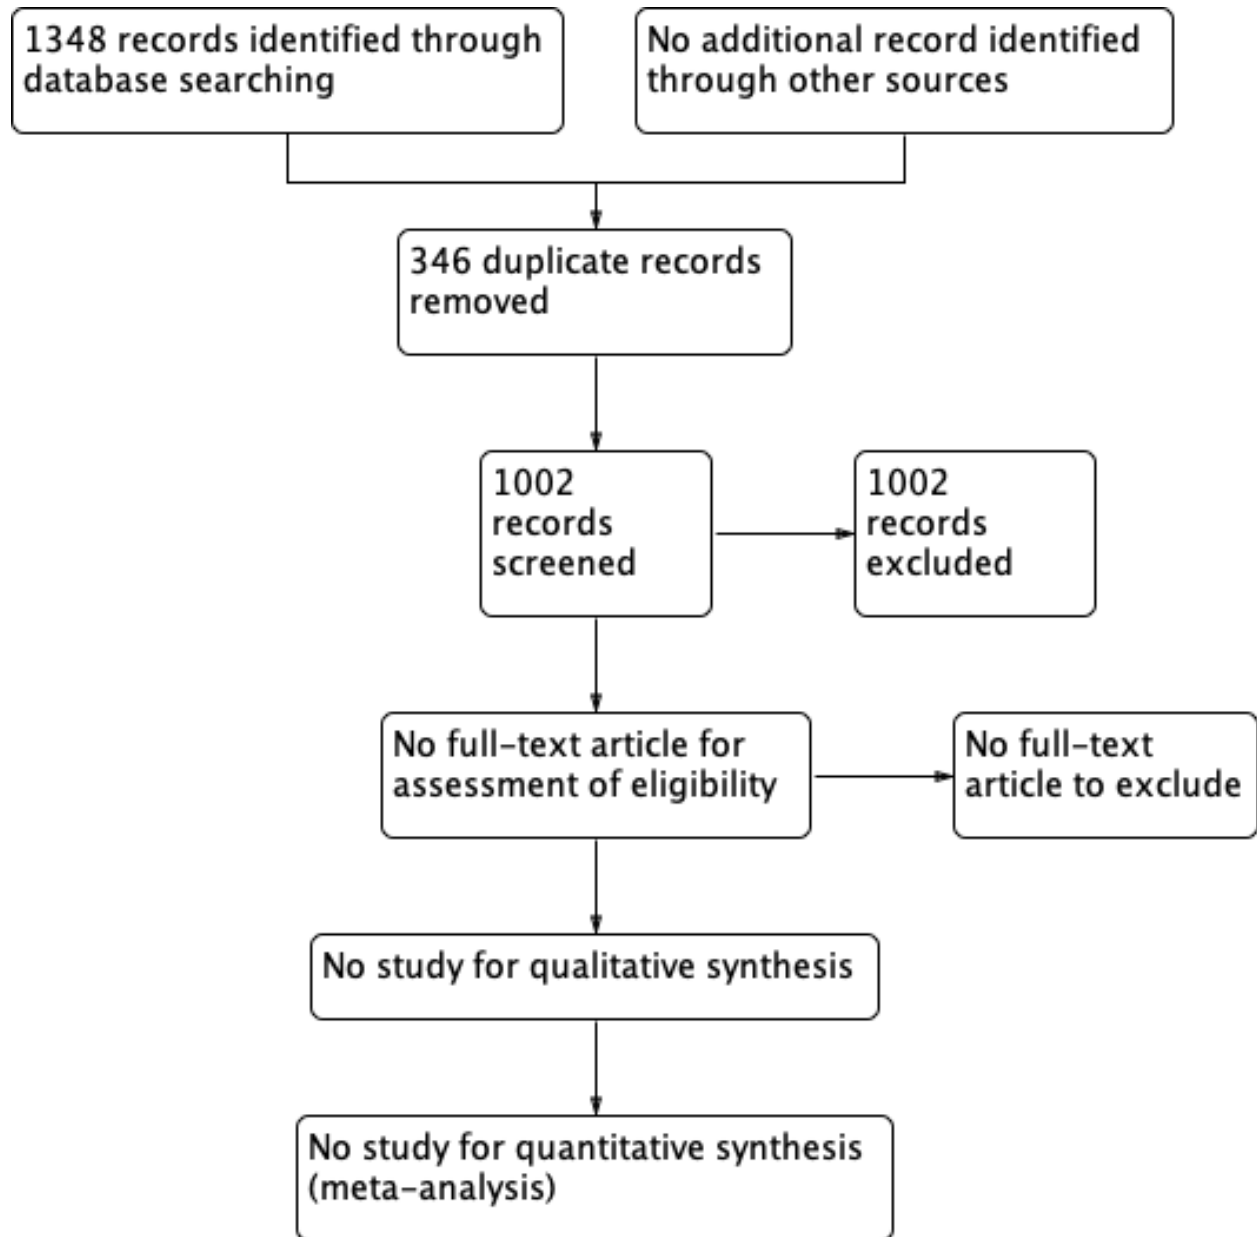

eFigure 5.4: Medical treatment in patients with renal failure

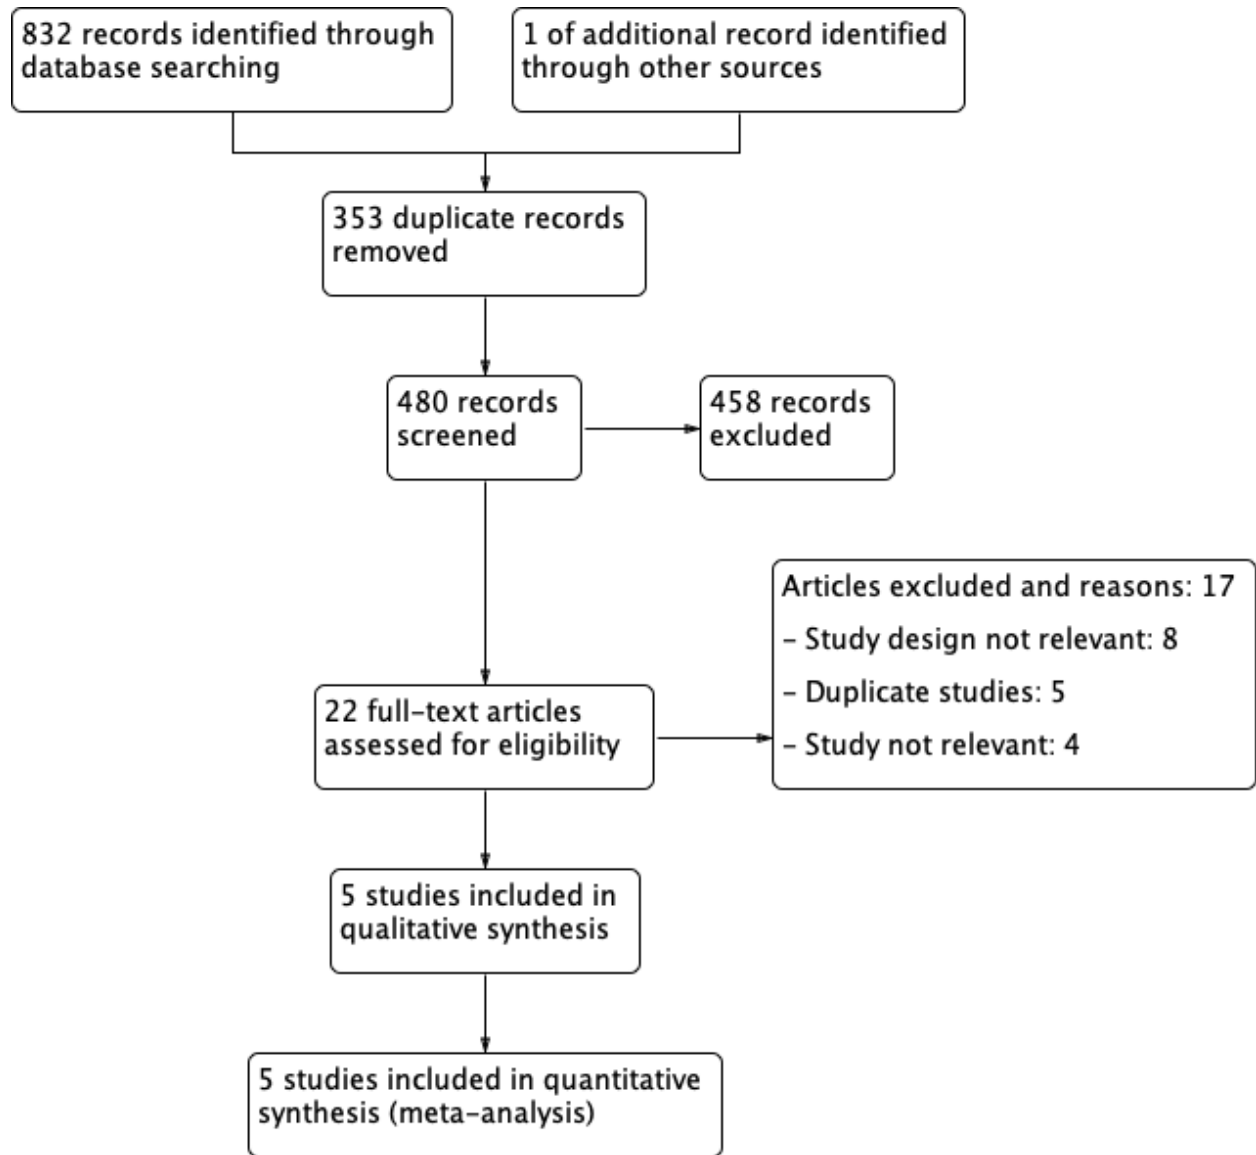

**eFigure 6: Overall risk of bias of included studies**

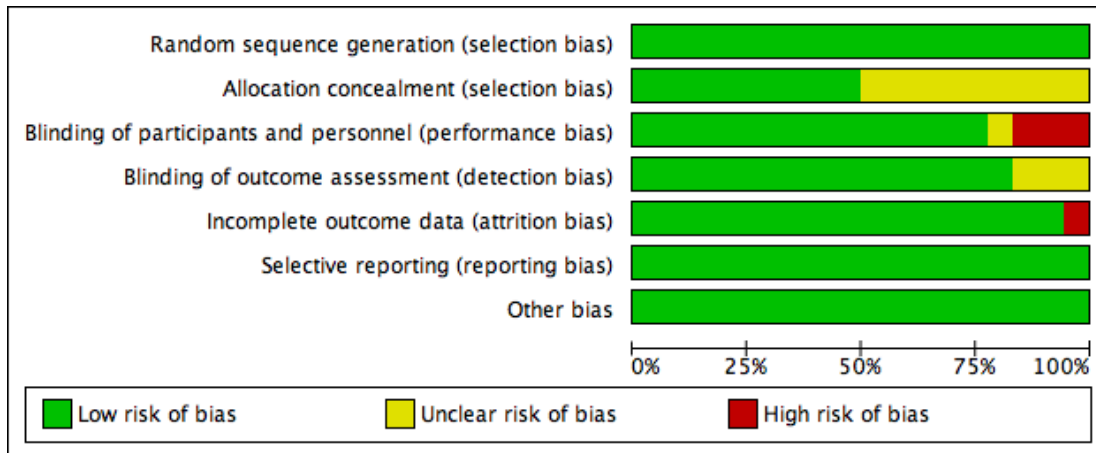

eFigure 7: Risk of bias of individual studies

|                        | Random sequence generation (selection bias) | Allocation concealment (selection bias) | Blinding of participants and personnel (performance bias) | Blinding of outcome assessment (detection bias) | Incomplete outcome data (attrition bias) | Selective reporting (reporting bias) | Other bias |
|------------------------|---------------------------------------------|-----------------------------------------|-----------------------------------------------------------|-------------------------------------------------|------------------------------------------|--------------------------------------|------------|
| Anonymous 1993         | +                                           | +                                       | +                                                         | +                                               | ⊖                                        | +                                    | +          |
| Bohula 2016            | +                                           | ?                                       | +                                                         | +                                               | +                                        | +                                    | +          |
| Connolly 2009          | +                                           | ?                                       | +                                                         | +                                               | +                                        | +                                    | +          |
| Diener 1996            | +                                           | +                                       | +                                                         | +                                               | +                                        | +                                    | +          |
| Diener 2010            | +                                           | +                                       | +                                                         | +                                               | +                                        | +                                    | +          |
| Diener 2012            | +                                           | +                                       | +                                                         | +                                               | +                                        | +                                    | +          |
| Easton 2012            | +                                           | ?                                       | +                                                         | +                                               | +                                        | +                                    | +          |
| Ezekowitz 1992         | +                                           | +                                       | +                                                         | +                                               | +                                        | +                                    | +          |
| Fox 2011               | +                                           | ?                                       | +                                                         | +                                               | +                                        | +                                    | +          |
| Hankey 2012            | +                                           | +                                       | +                                                         | +                                               | +                                        | +                                    | +          |
| Hijazi 2014            | +                                           | ?                                       | +                                                         | +                                               | +                                        | +                                    | +          |
| Hohnloser 2012         | +                                           | ?                                       | +                                                         | +                                               | +                                        | +                                    | +          |
| Holmes 2009 PREVAIL    | +                                           | +                                       | ⊖                                                         | ?                                               | +                                        | +                                    | +          |
| Holmes 2014 PROTECT AF | +                                           | +                                       | ⊖                                                         | ?                                               | +                                        | +                                    | +          |
| Hori 2012              | +                                           | ?                                       | +                                                         | +                                               | +                                        | +                                    | +          |
| Mant 2007              | +                                           | +                                       | ?                                                         | +                                               | +                                        | +                                    | +          |
| Rost 2016              | +                                           | ?                                       | +                                                         | +                                               | +                                        | +                                    | +          |
| Yamaguchi 2000         | +                                           | ?                                       | ⊖                                                         | ?                                               | +                                        | +                                    | +          |



# 1. Medical treatment in patients with ischemic stroke

**eTable 2. Effect of Aspirin compared to Placebo in patients with previous ischemic stroke or TIA and AF**

| Certainty assessment                              |                   |              |               |              |                      |                                                  | № of patients   |                 | Effect                            |                                                         | Certainty                                                                                         | Importance |
|---------------------------------------------------|-------------------|--------------|---------------|--------------|----------------------|--------------------------------------------------|-----------------|-----------------|-----------------------------------|---------------------------------------------------------|---------------------------------------------------------------------------------------------------|------------|
| № of studies                                      | Study design      | Risk of bias | Inconsistency | Indirectness | Imprecision          | Other considerations                             | Aspirin         | Placebo         | Relative (95% CI)                 | Absolute (95% CI)                                       |                                                                                                   |            |
| Stroke and thromboembolism                        |                   |              |               |              |                      |                                                  |                 |                 |                                   |                                                         |                                                                                                   |            |
| 3                                                 | randomised trials | not serious  | not serious   | not serious  | not serious          | publication bias strongly suspected <sup>a</sup> | 119/542 (22.0%) | 126/500 (25.2%) | <b>OR 0.83</b><br>(0.62 to 1.10)  | <b>33 fewer per 1,000</b><br>(from 18 more to 79 fewer) | <br>MODERATE   | CRITICAL   |
| Ischemic stroke                                   |                   |              |               |              |                      |                                                  |                 |                 |                                   |                                                         |                                                                                                   |            |
| 1                                                 | randomised trials | not serious  | not serious   | not serious  | not serious          | publication bias strongly suspected <sup>b</sup> | 64/404 (15.8%)  | 73/378 (19.3%)  | <b>OR 0.79</b><br>(0.54 to 1.14)  | <b>34 fewer per 1,000</b><br>(from 21 more to 79 fewer) | <br>MODERATE   | CRITICAL   |
| Intracerebral hemorrhage                          |                   |              |               |              |                      |                                                  |                 |                 |                                   |                                                         |                                                                                                   |            |
| 1                                                 | randomised trials | not serious  | not serious   | not serious  | serious <sup>c</sup> | publication bias strongly suspected <sup>b</sup> | 1/404 (0.2%)    | 0/378 (0.0%)    | <b>OR 2.81</b><br>(0.11 to 69.29) | <b>0 fewer per 1,000</b><br>(from 0 fewer to 0 fewer)   | <br>LOW       | CRITICAL   |
| Major bleeding                                    |                   |              |               |              |                      |                                                  |                 |                 |                                   |                                                         |                                                                                                   |            |
| 1                                                 | randomised trials | not serious  | not serious   | not serious  | not serious          | publication bias strongly suspected <sup>b</sup> | 6/404 (1.5%)    | 4/378 (1.1%)    | <b>OR 1.41</b><br>(0.39 to 5.03)  | <b>4 more per 1,000</b><br>(from 6 fewer to 40 more)    | <br>MODERATE | CRITICAL   |
| Non-fatal stroke, non-fatal MI and vascular death |                   |              |               |              |                      |                                                  |                 |                 |                                   |                                                         |                                                                                                   |            |
| 1                                                 | randomised trials | not serious  | not serious   | not serious  | not serious          | publication bias strongly suspected <sup>b</sup> | 124/404 (30.7%) | 127/378 (33.6%) | <b>OR 0.88</b><br>(0.65 to 1.18)  | <b>28 fewer per 1,000</b><br>(from 38 more to 88 fewer) | <br>MODERATE | CRITICAL   |
| Death                                             |                   |              |               |              |                      |                                                  |                 |                 |                                   |                                                         |                                                                                                   |            |
| 1                                                 | randomised trials | not serious  | not serious   | not serious  | not serious          | publication bias strongly suspected <sup>b</sup> | 102/404 (25.2%) | 99/378 (26.2%)  | <b>OR 0.95</b><br>(0.69 to 1.31)  | <b>10 fewer per 1,000</b><br>(from 55 more to 65 fewer) | <br>MODERATE | CRITICAL   |

CI: Confidence interval; OR: Odds ratio

### Explanations

- a. Three studies to report this outcome
- b. Single study
- c. Wide confidence intervals

**eFigure 8: Effect of antiplatelet drugs versus placebo on stroke or thromboembolism in patients with previous ischemic stroke or TIA and AF**

**Aspirin**

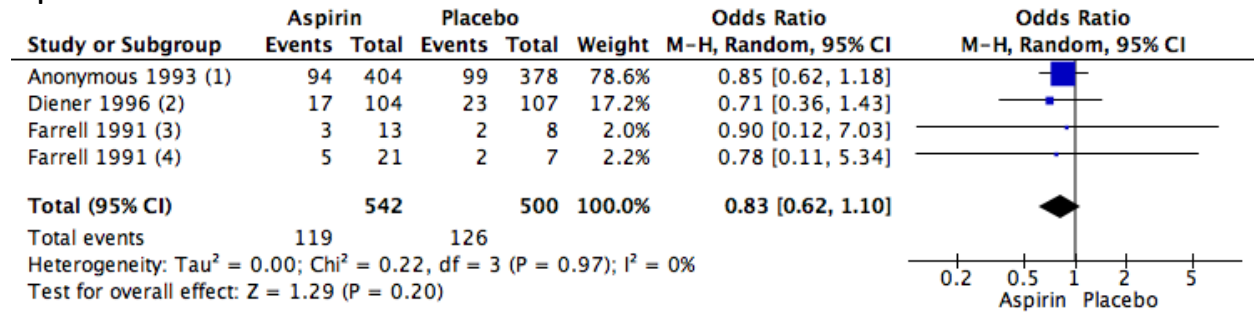

(1) Aspirin 300 mg; (2) Aspirin 25 mg twice daily; (3) Aspirin 1200 mg; (4) Aspirin 300 mg

**Aspirin and dipyridamole**

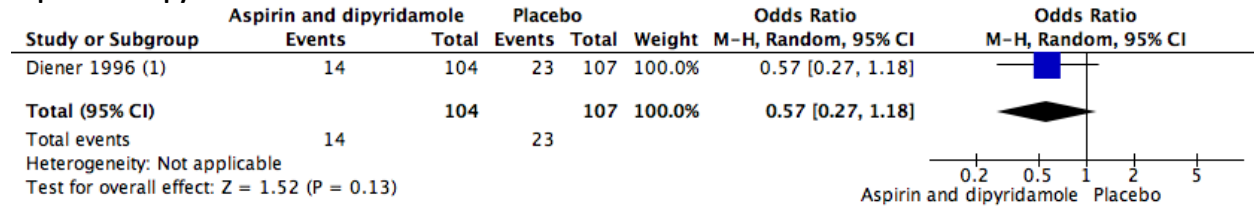

(1) Aspirin 25 mg twice daily and dipyridamole 200 mg twice daily

**Dipyridamole**

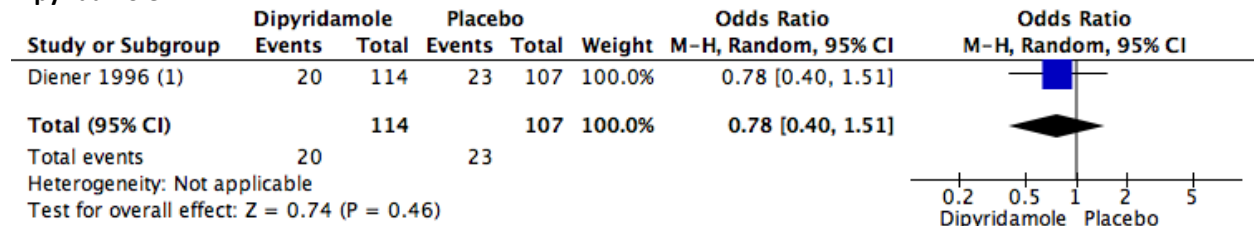

(1) Modified dose dipyridamole 200 mg twice daily

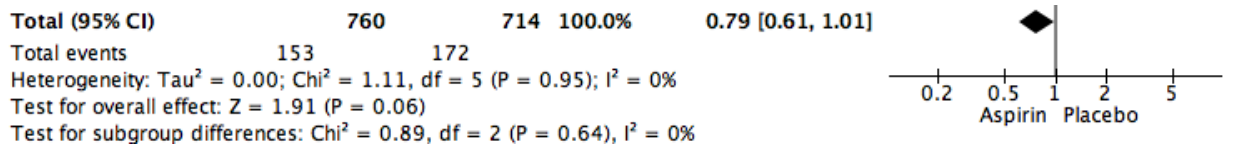

eFigure 9A. NOAC vs warfarin in patients with previous ischemic stroke or TIA and AF: Death

**Apixaban (5 mg) twice daily**

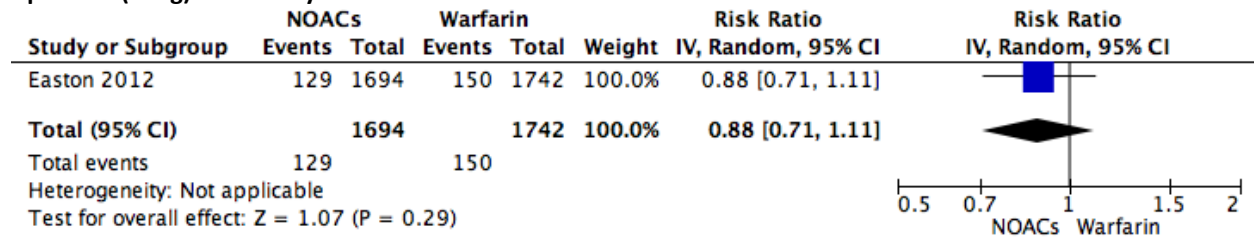

**Dabigatran (110 mg, 150 mg) twice daily**

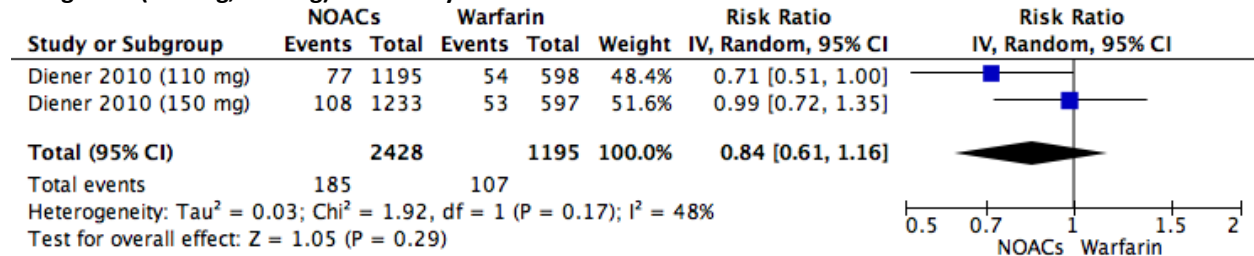

**Rivaroxaban (20 mg) daily**

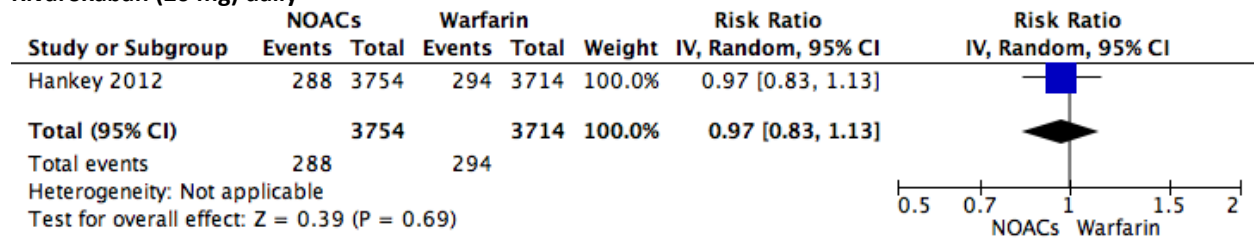

**Edoxaban (60 mg, 30 mg) daily**

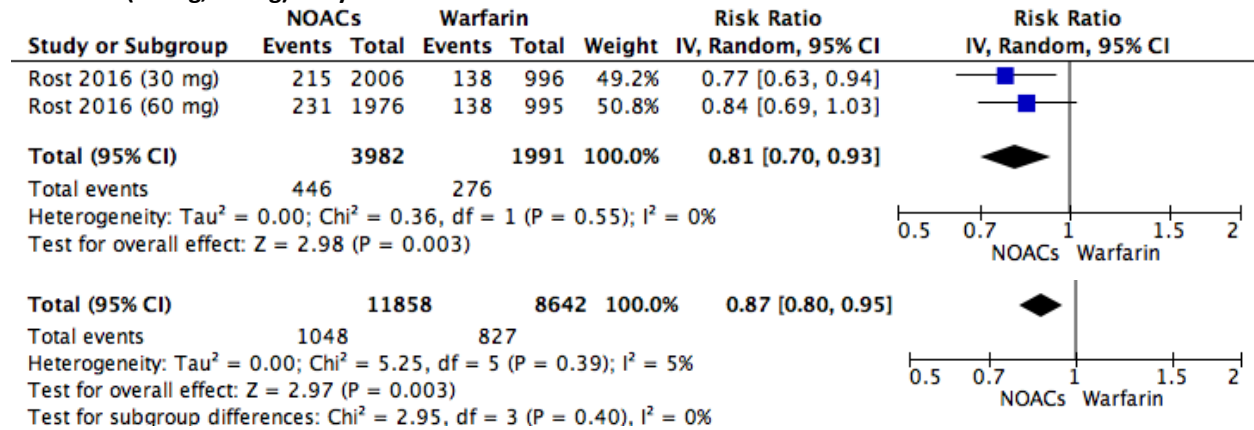

eFigure 9B. Funnel plot: NOAC vs warfarin in patients with previous ischemic stroke or TIA and AF: Death

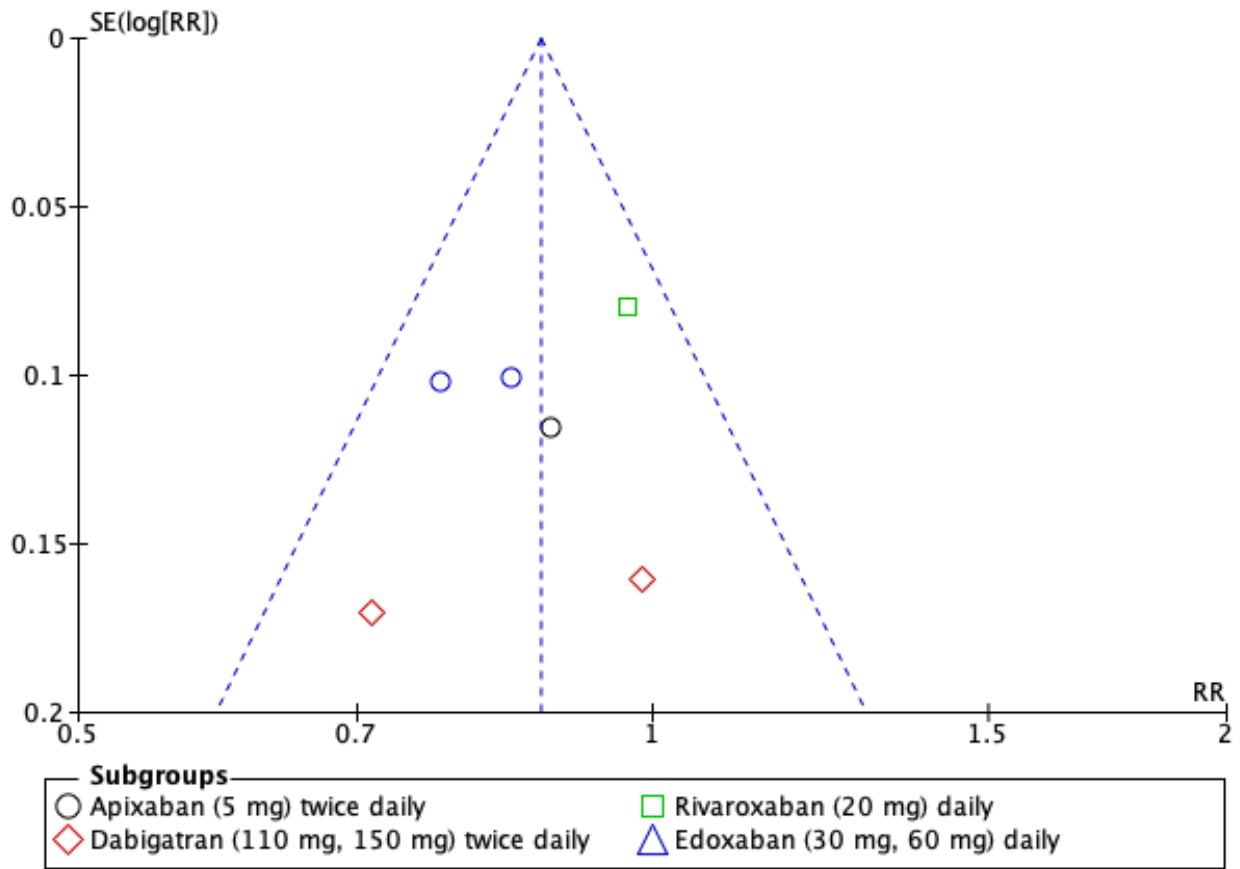

**eFigure 10A. NOAC vs warfarin in patients with previous ischemic stroke or TIA and AF: Stroke or thromboembolism**

**Apixaban (5 mg) twice daily**

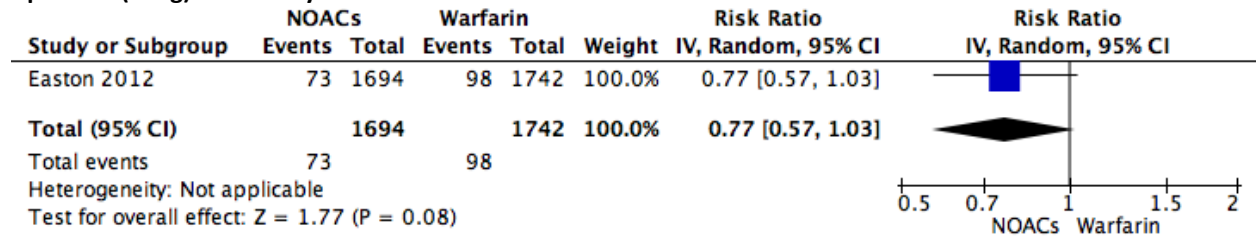

**Dabigatran (110 mg, 150 mg) twice daily**

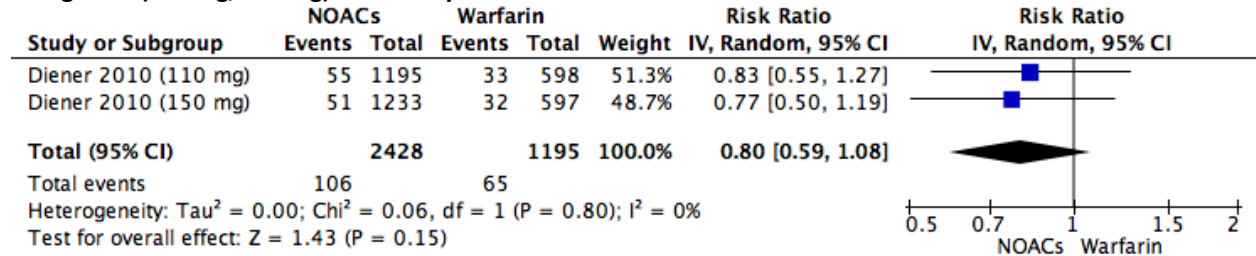

**Rivaroxaban (20 mg) daily**

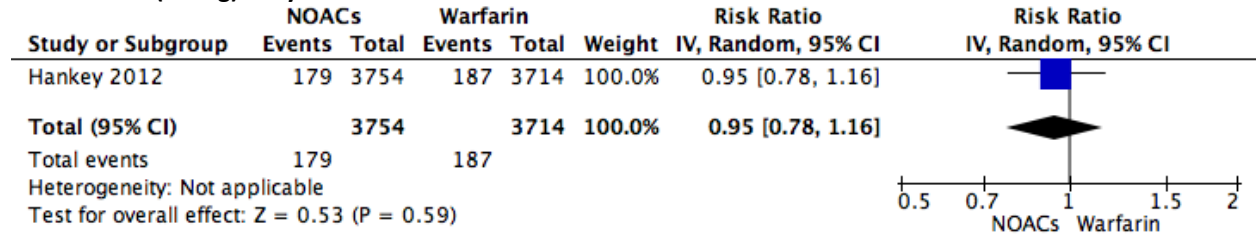

**Edoxaban (60 mg, 30 mg) daily**

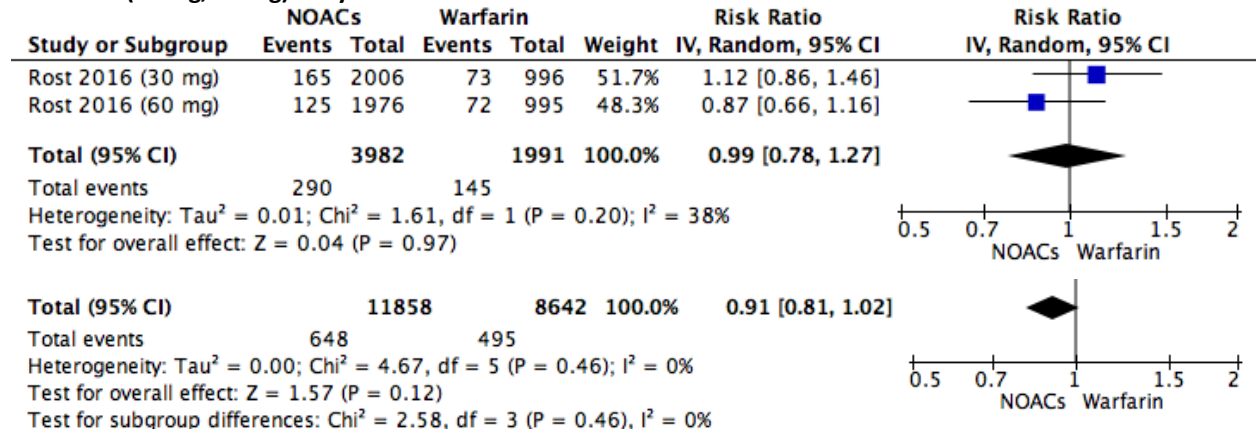

**eFigure 10B. Funnel plot: NOAC vs warfarin in patients with previous ischemic stroke or TIA and AF: Stroke or thromboembolism**

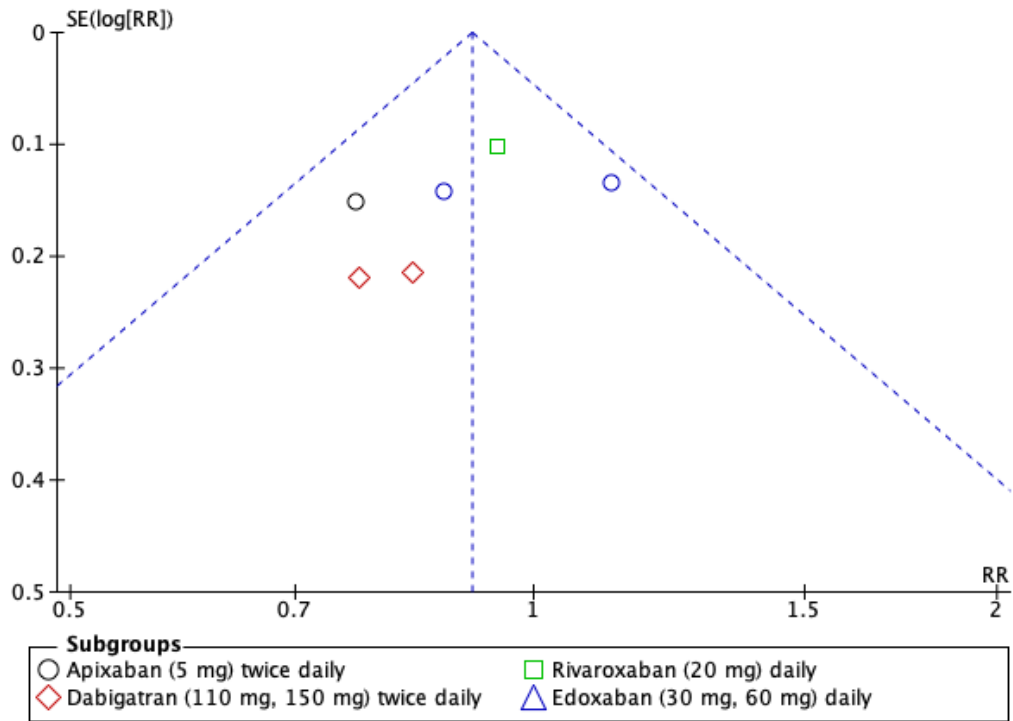

**eFigure 10C. Funnel plot: NOAC vs warfarin in patients with previous ischemic stroke or TIA and AF: Ischemic stroke**

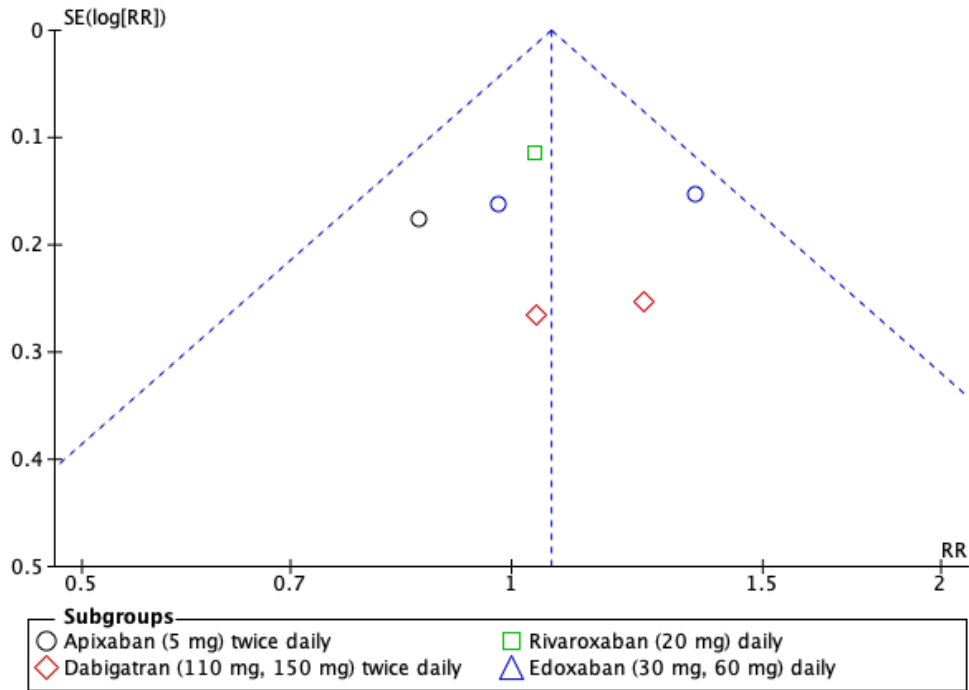

**eTable 3: Effect of NOACs compared to warfarin on the various outcomes in patients with previous ischemic stroke or TIA with two dabigatran and edoxaban dosing regimens pooled separately and factor Xa inhibitors pooled separately**

| Outcome                            | Incidence (%)     |                  | n (N)      | RR [95% CI]       | I <sup>2</sup> , p | P value  |
|------------------------------------|-------------------|------------------|------------|-------------------|--------------------|----------|
|                                    | NOAC              | Warfarin         |            |                   |                    |          |
| <b>Stroke or thromboembolism</b>   |                   |                  |            |                   |                    |          |
| Overall                            | 5.5% (648/11,858) | 5.7% (495/8,642) | 4 (20,500) | 0.91 [0.81, 1.02] | 0%, p=0.46         | 0.12     |
| Ap,Riv,Ed (60mg), Da (150, 100 mg) | 4.9% (483/9,852)  | 5.7% (495/8,642) | 4 (18,494) | 0.87 [0.75, 1.00] | 0%, p=0.59         | 0.02     |
| Ap,Riv,Ed (30mg),Da (150, 100 mg)  | 5.3% (523/9,882)  | 5.7% (495/8,642) | 4 (18,524) | 0.92 [0.79, 1.08] | 31%, p=0.22        | 0.31     |
| Ap,Riv,Ed (60mg),Da (150 mg)       | 4.9% (428/8,657)  | 5.7% (495/8,642) | 4 (17,299) | 0.86 [0.76, 0.98] | 0%, p=0.59         | 0.02     |
| Ap,Riv,Ed (60mg),Da (110 mg)       | 5.0% (432/8,619)  | 5.7% (495/8,642) | 4 (17,261) | 0.88 [0.77, 0.99] | 0%, p=0.70         | 0.04     |
| Ap,Riv,Ed (30mg),Da (150 mg)       | 5.4% (468/8,687)  | 5.7% (495/8,642) | 4 (17,329) | 0.92 [0.77, 1.10] | 50%, p=0.11        | 0.36     |
| Ap,Riv,Ed (30mg),Da (110 mg)       | 5.5% (472/8,649)  | 5.7% (495/8,642) | 4 (17,291) | 0.94 [0.80, 1.11] | 39%, p=0.17        | 0.45     |
| Xa inhibitors                      | 5.7% (542/9,430)  | 5.8% (430/7,447) | 3 (16,877) | 0.93 [0.81, 1.07] | 21%, p=0.28        | 0.32     |
| Xa inhibitors<br>Ap,Riv,Ed 60mg    | 5.1% (377/7424)   | 5.8% (430/7447)  | 3 (14,871) | 0.88 [0.77, 1.01] | 0%, p=0.50         | 0.06     |
| Xa inhibitors<br>Ap,Riv,Ed 30mg    | 5.6% (417/7,454)  | 5.8% (430/7,447) | 3 (14,901) | 0.95 [0.78, 1.17] | 55%, p=0.11        | 0.65     |
| <b>Ischemic stroke</b>             |                   |                  |            |                   |                    |          |
| Overall <sup>a</sup>               | 6.4% (254/3,982)  | 5.5% (109/1,991) | 1 (5,973)  | 1.15 [0.84, 1.57] | 51%, p=0.16        | 0.37     |
| Ed 60 mg                           | 5.3% (105/1,976)  | 5.5% (109/1,991) | 1 (3,967)  | 0.97 [0.75, 1.26] | NA                 | 0.82     |
| Ed 30 mg                           | 7.4% (149/2,006)  | 5.5% (109/1,991) | 1 (3,997)  | 1.36 [1.07, 1.72] | NA                 | 0.01     |
| Xa inhibitors <sup>a</sup>         | 6.4% (254/3,982)  | 5.5% (109/1,991) | 1 (5,973)  | 1.15 [0.84, 1.57] | 51%, p=0.16        | 0.37     |
| Xa inhibitors<br>Ed 60 mg          | 5.3% (105/1,976)  | 5.5% (109/1,991) | 1 (3,967)  | 0.97 [0.75, 1.26] | NA                 | 0.82     |
| Xa inhibitors<br>Ed 30 mg          | 7.4% (149/2,006)  | 5.5% (109/1,991) | 1 (3,997)  | 1.36 [1.07, 1.72] | NA                 | 0.01     |
| <b>Intracerebral hemorrhage</b>    |                   |                  |            |                   |                    |          |
| Overall                            | 0.6% (69/11,858)  | 1.3% (110/8,642) | 4 (20,500) | 0.43 [0.29, 0.64] | 34%, p=0.18        | < 0.0001 |
| Ap,Riv,Ed (60mg),Da (150, 100 mg)  | 0.6% (57/9,852)   | 1.3% (110/8,642) | 4 (18,494) | 0.44 [0.28, 0.69] | 44%, p=0.13        | 0.0004   |
| Ap,Riv,Ed (30mg),Da (150, 100 mg)  | 0.5% (53/9,882)   | 1.3% (110/8,642) | 4 (18,524) | 0.40 [0.25, 0.65] | 45%, p=0.12        | 0.0002   |
| Ap,Riv,Ed (60mg),Da (150 mg)       | 0.6% (55/8,657)   | 1.3% (110/8,642) | 4 (17,299) | 0.50 [0.35, 0.72] | 20%, p=0.29        | 0.0002   |
| Ap,Riv,Ed (60mg),Da (110 mg)       | 0.6% (52/8,619)   | 1.3% (110/8,642) | 4 (17,261) | 0.46 [0.27, 0.77] | 53%, p=0.10        | 0.003    |

| Outcome                           | Incidence (%)       |                  | n (N)      | RR [95% CI]       | I <sup>2</sup> , p | P value |
|-----------------------------------|---------------------|------------------|------------|-------------------|--------------------|---------|
|                                   | NOAC                | Warfarin         |            |                   |                    |         |
| Ap,Riv,Ed (30mg),Da (150 mg)      | 0.6% (51/8,687)     | 1.3% (110/8,642) | 4 (17,329) | 0.46 [0.30, 0.69] | 29%, p=0.24        | 0.0002  |
| Ap,Riv,Ed (30mg),Da (110 mg)      | 0.6% (48/8,649)     | 1.3% (110/8,642) | 4 (17,291) | 0.42 [0.24, 0.72] | 56%, p=0.08        | 0.002   |
| Xa inhibitors                     | 0.7% (62/9,430)     | 1.2% (92/7,447)  | 3 (16,877) | 0.52 [0.37, 0.72] | 0%, p=0.42         | <0.0001 |
| Xa inhibitors<br>Ap,Riv,Ed 60mg   | 0.7% (50/7,424)     | 1.2% (92/7,447)  | 3 (14,871) | 0.55 [0.39, 0.78] | 0%, p=0.38         | 0.0007  |
| Xa inhibitors<br>Ap,Riv,Ed 30mg   | 0.6% (46/7,454)     | 1.2% (92/7,447)  | 3 (14,901) | 0.50 [0.33, 0.76] | 29%, p=0.24        | 0.001   |
| Major bleeding complications      |                     |                  |            |                   |                    |         |
| Overall                           | 5.5% (649/11,858)   | 6.4% (551/8,642) | 4 (20,500) | 0.79 [0.64, 0.96] | 67%, p=0.01        | 0.02    |
| Ap,Riv,Ed (60mg),Da (150, 100 mg) | 5.7% (560/9,852)    | 6.4% (551/8,642) | 4 (18,494) | 0.86 [0.75, 0.98] | 25%, p=0.26        | 0.03    |
| Ap,Riv,Ed (30mg),Da (150, 100 mg) | 5.2% (511/9,882)    | 6.4% (551/8,642) | 4 (18,524) | 0.77 [0.60, 1.00] | 77%, p=0.002       | 0.05    |
| Ap,Riv,Ed (60mg),Da (150 mg)      | 5.7% (495/8,657)    | 6.4% (551/8,642) | 4 (17,299) | 0.90 [0.78, 1.02] | 18%, p=0.34        | 0.10    |
| Ap,Riv,Ed (60mg),Da (110 mg)      | 5.3% (458/8,619)    | 6.4% (551/8,642) | 4 (17,261) | 0.82 [0.71, 0.95] | 27%, p=0.25        | 0.009   |
| Ap,Riv,Ed (30mg),Da (150 mg)      | 5.1% (446/8,687)    | 6.4% (551/8,642) | 4 (17,329) | 0.79 [0.59, 1.07] | 83%, p=0.0005      | 0.14    |
| Ap,Riv,Ed (30mg),Da (110 mg)      | 4.7% (409/8,649)    | 6.4% (551/8,642) | 4 (17,291) | 0.72 [0.55, 0.95] | 78%, p=0.003       | 0.02    |
| Xa inhibitors                     | 5.1% (482/9,430)    | 6.1% (456/7,447) | 3 (16,877) | 0.76 [0.59, 0.98] | 74%, p=0.009       | 0.03    |
| Xa inhibitors<br>Ap,Riv,Ed 60mg   | 5.3% (393/7,424)    | 6.1% (456/7,447) | 3 (14,871) | 0.86 [0.75, 0.99] | 9%, p=0.33         | 0.04    |
| Xa inhibitors<br>Ap,Riv,Ed 30mg   | 4.6% (344/7,454)    | 6.1% (456/7,447) | 3 (14,901) | 0.73 [0.51, 1.05] | 85%, p=0.001       | 0.09    |
| Death                             |                     |                  |            |                   |                    |         |
| Overall                           | 8.8% (1,048/11,858) | 9.6% (827/8,642) | 4 (20,500) | 0.87 [0.80, 0.95] | 5%, p=0.55         | 0.0003  |
| Ap,Riv,Ed (60mg),Da (150, 100 mg) | 8.5% (833/9,852)    | 9.6% (827/8,642) | 4 (18,494) | 0.89 [0.81, 0.98] | 0%, p=0.45         | 0.02    |
| Ap,Riv,Ed (30mg),Da (150, 100 mg) | 8.3% (817/9,882)    | 9.6% (827/8,642) | 4 (18,524) | 0.87 [0.77, 0.97] | 30%, p=0.22        | 0.02    |
| Ap,Riv,Ed (60mg),Da (150 mg)      | 8.7% (756/8,657)    | 9.6% (827/8,642) | 4 (17,299) | 0.91 [0.83, 1.00] | 0%, p=0.61         | 0.06    |
| Ap,Riv,Ed (60mg),Da (110 mg)      | 8.4% (725/8,619)    | 9.6% (827/8,642) | 4 (17,261) | 0.88 [0.79, 0.97] | 19%, p=0.19        | 0.02    |
| Ap,Riv,Ed (30mg),Da (150 mg)      | 8.5% (740/8,687)    | 9.6% (827/8,642) | 4 (17,329) | 0.89 [0.79, 1.00] | 32%, p=0.22        | 0.05    |
| Ap,Riv,Ed (30mg),Da (110 mg)      | 8.2% (709/8,649)    | 9.6% (827/8,642) | 4 (17,291) | 0.85 [0.74, 0.97] | 44%, p=0.15        | 0.01    |
| Xa inhibitors                     | 9.2% (863/9,430)    | 9.7% (720/7,447) | 3 (16,877) | 0.88 [0.79, 0.97] | 8%, p=0.35         | 0.009   |
| Xa inhibitors<br>Ap,Riv,Ed 60mg   | 8.7% (648/7,424)    | 9.7% (720/7,447) | 3 (14,871) | 0.90 [0.82, 1.00] | 0%, p=0.47         | 0.05    |



| Outcome                         | Incidence (%)    |                     | n (N)      | RR [95% CI]       | I <sup>2</sup> , p | P value |
|---------------------------------|------------------|---------------------|------------|-------------------|--------------------|---------|
|                                 | NOAC             | Warfarin            |            |                   |                    |         |
| Xa inhibitors<br>Ap,Riv,Ed 30mg | 8.5% (632/7,454) | 9.7%<br>(720/7,447) | 3 (14,901) | 0.87 [0.76, 1.01] | 47%,<br>p=0.15     | 0.06    |

a: Data not reported on Apixaban, Rivaroxaban and Dabigatran; Ap,Riv,Ed,Da (150 mg): Apixaban, Rivaroxaban or Edoxaban, Dabigatran 150 mg; Ap,Riv,Ed,Da (110 mg): Apixaban, Rivaroxaban or Edoxaban, Dabigatran 110 mg; CI: Confidence interval; I<sup>2</sup>, p: Heterogeneity; n: Number of studies; N: Number of patients; NA: Not applicable; p: Statistical significance value; RR: Risk Ratio; Xa inhibitors: Apixaban, Rivaroxaban or Edoxaban

**eFigure 11A. NOAC vs warfarin in patients with previous ischemic stroke or TIA and AF:  
Major bleeding complications**

**Apixaban (5 mg) twice daily**

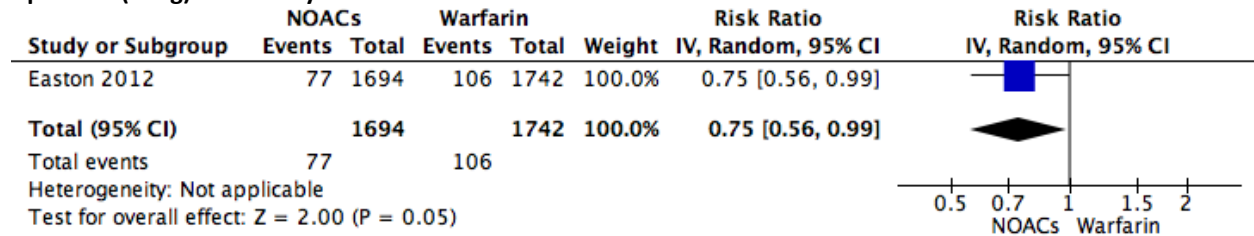

**Dabigatran (110 mg, 150 mg) twice daily**

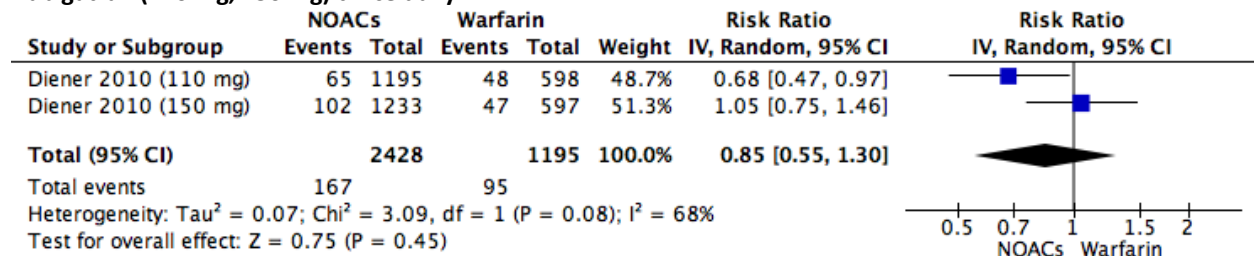

**Rivaroxaban (20 mg) daily**

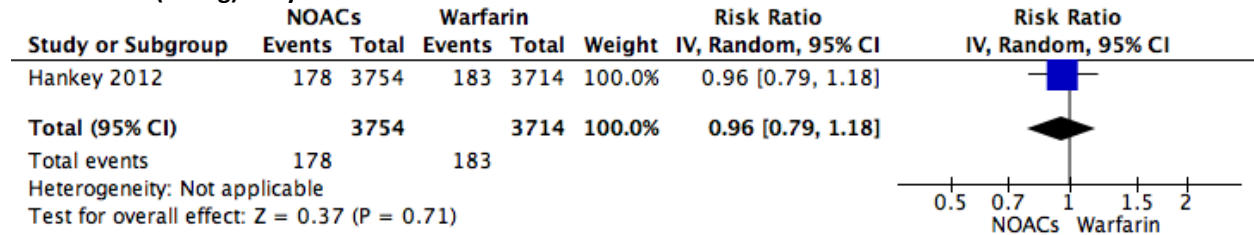

**Edoxaban (60 mg, 30 mg) daily**

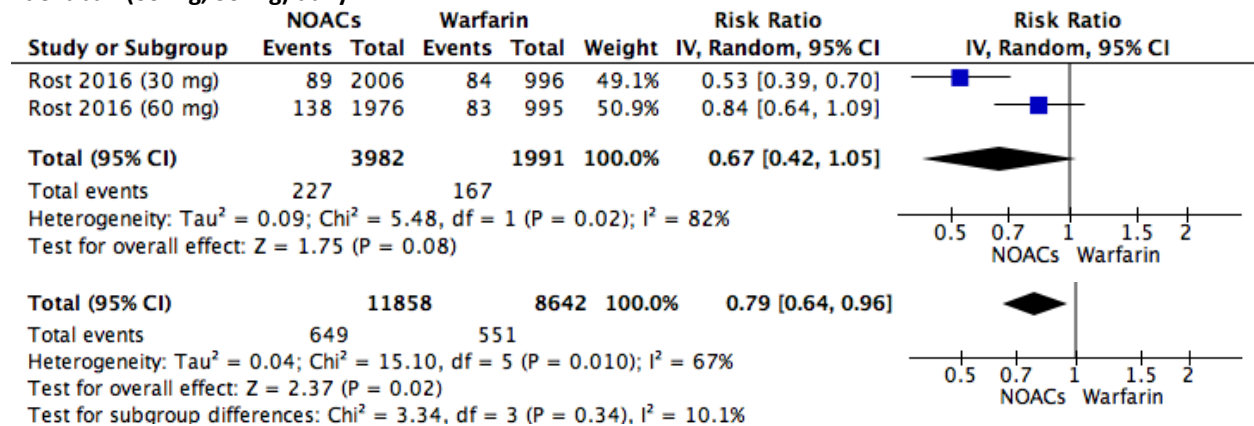

eFigure 11B. Funnel plot: NOAC vs warfarin in patients with previous ischemic stroke or TIA and AF: Major bleeding complications

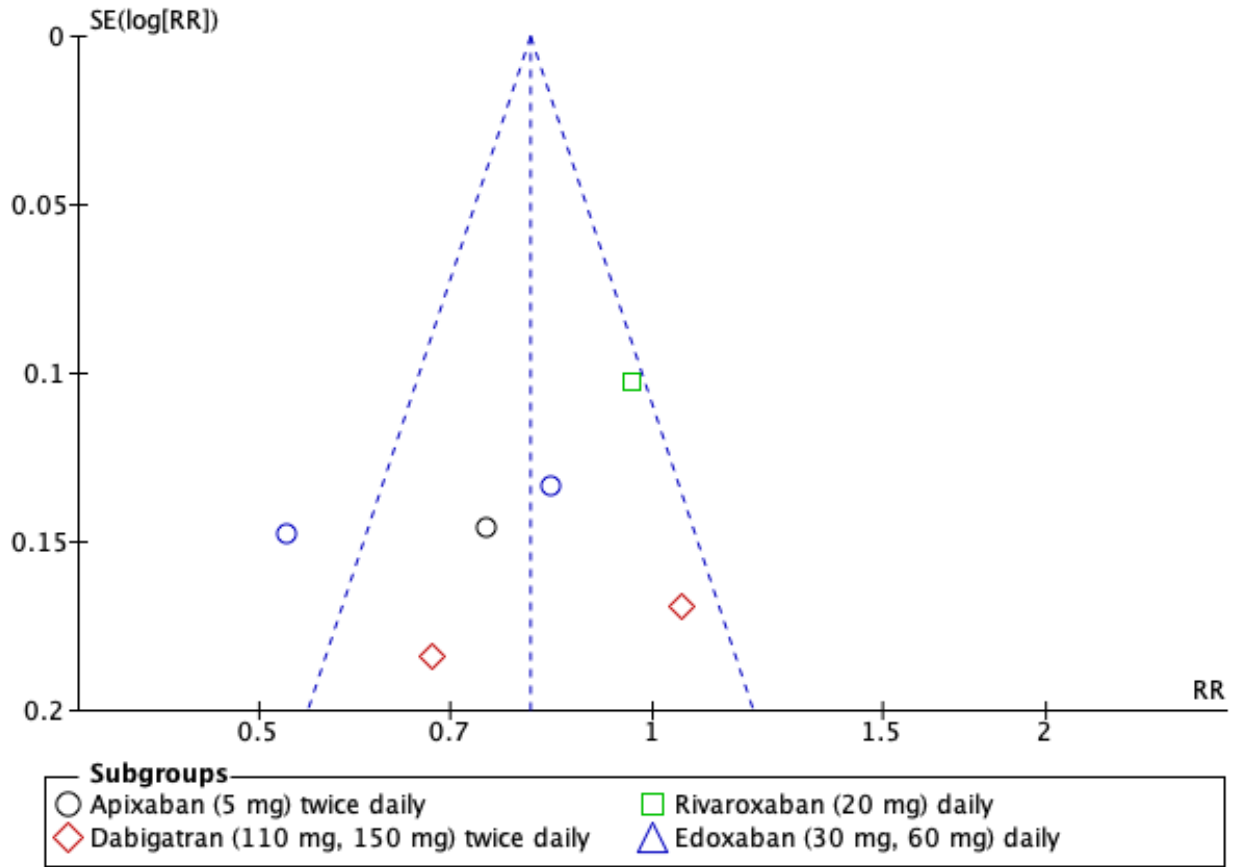

**eTable 4. Effect of NOACs (Apixaban, Dabigatran, Rivaroxaban or Edoxaban) compared to Warfarin on death in patients with previous stroke or TIA with two dabigatran and edoxaban dosing regimens pooled separately and factor Xa inhibitors pooled separately**

| Outcome                           | Incidence (%)              |                         | n (N)            | RR [95% CI]              | I <sup>2</sup> , p     | P value       |
|-----------------------------------|----------------------------|-------------------------|------------------|--------------------------|------------------------|---------------|
|                                   | NOAC                       | Warfarin                |                  |                          |                        |               |
| <b>Death</b>                      |                            |                         |                  |                          |                        |               |
| Overall                           | <b>8.8% (1,048/11,858)</b> | <b>9.6% (827/8,642)</b> | <b>4(20,500)</b> | <b>0.87 [0.80, 0.95]</b> | <b>5%,<br/>p=0.55</b>  | <b>0.0003</b> |
| Ap,Riv,Ed (60mg),Da (150, 100 mg) | <b>8.5% (833/9,852)</b>    | <b>9.6% (827/8,642)</b> | <b>4(18,494)</b> | <b>0.89 [0.81, 0.98]</b> | <b>0%,<br/>p=0.45</b>  | <b>0.02</b>   |
| Ap,Riv,Ed (30mg),Da (150, 100 mg) | <b>8.3% (817/9,882)</b>    | <b>9.6% (827/8,642)</b> | <b>4(18,524)</b> | <b>0.87 [0.77, 0.97]</b> | <b>30%,<br/>p=0.22</b> | <b>0.02</b>   |
| Ap,Riv,Ed (60mg),Da (150 mg)      | 8.7% (756/8,657)           | 9.6% (827/8,642)        | 4(17,299)        | 0.91 [0.83, 1.00]        | 0%,<br>p=0.61          | 0.06          |
| Ap,Riv,Ed (60mg),Da (110 mg)      | <b>8.4% (725/8,619)</b>    | <b>9.6% (827/8,642)</b> | <b>4(17,261)</b> | <b>0.88 [0.79, 0.97]</b> | <b>19%,<br/>p=0.19</b> | <b>0.02</b>   |
| Ap,Riv,Ed (30mg),Da (150 mg)      | <b>8.5% (740/8,687)</b>    | <b>9.6% (827/8,642)</b> | <b>4(17,329)</b> | <b>0.89 [0.79, 1.00]</b> | <b>32%,<br/>p=0.22</b> | <b>0.05</b>   |
| Ap,Riv,Ed (30mg),Da (110 mg)      | <b>8.2% (709/8,649)</b>    | <b>9.6% (827/8,642)</b> | <b>4(17,291)</b> | <b>0.85 [0.74, 0.97]</b> | <b>44%,<br/>p=0.15</b> | <b>0.01</b>   |
| Xa inhibitors                     | <b>9.2% (863/9,430)</b>    | <b>9.7% (720/7,447)</b> | <b>3(16,877)</b> | <b>0.88 [0.79, 0.97]</b> | <b>8%,<br/>p=0.35</b>  | <b>0.009</b>  |
| Xa inhibitors<br>Ap,Riv,Ed 60mg   | <b>8.7% (648/7,424)</b>    | <b>9.7% (720/7,447)</b> | <b>3(14,871)</b> | <b>0.90 [0.82, 1.00]</b> | <b>0%,<br/>p=0.47</b>  | <b>0.05</b>   |
| Xa inhibitors<br>Ap,Riv,Ed 30mg   | 8.5% (632/7,454)           | 9.7% (720/7,447)        | 3(14,901)        | 0.87 [0.76, 1.01]        | 47%,<br>p=0.15         | 0.06          |

Ap,Riv,Ed,Da (150 mg): Apixaban, Rivaroxaban or Edoxaban, Dabigatran 150 mg; Ap,Riv,Ed,Da (110 mg): Apixaban, Rivaroxaban or Edoxaban, Dabigatran 110 mg; CI: Confidence interval; I<sup>2</sup>, p: Heterogeneity; n: Number of studies; N: Number of patients; NA: Not applicable; p: Statistical significance value; RR: Risk Ratio; Xa inhibitors: Apixaban, Rivaroxaban or Edoxaban

**eTable 5. Effect of NOACs (Apixaban, Dabigatran, Rivaroxaban or Edoxaban) compared to Warfarin on intracerebral hemorrhage and major bleeding complications in patients with previous stroke or TIA with two dabigatran and edoxaban dosing regimens pooled separately and factor Xa inhibitors pooled separately**

| Outcome                                     | Incidence (%)            |                         | n (N)            | RR [95% CI]              | I <sup>2</sup> , p      | P value      |
|---------------------------------------------|--------------------------|-------------------------|------------------|--------------------------|-------------------------|--------------|
|                                             | NOAC                     | Warfarin                |                  |                          |                         |              |
| <b>Intracerebral hemorrhage<sup>a</sup></b> |                          |                         |                  |                          |                         |              |
| Overall                                     | 0.7% (26/3,754)          | 0.8% (31/3,714)         | 1(7,468)         | 0.83 [0.49, 1.39]        | NA                      | 0.48         |
| Riv                                         | 0.7% (26/3,754)          | 0.8% (31/3,714)         | 1(7,468)         | 0.83 [0.49, 1.39]        | NA                      | 0.48         |
| Xa inhibitors                               | 0.7% (26/3,754)          | 0.8% (31/3,714)         | 1(7,468)         | 0.83 [0.49, 1.39]        | NA                      | 0.48         |
| <b>Major bleeding complications</b>         |                          |                         |                  |                          |                         |              |
| Overall                                     | <b>5.5% (649/11,858)</b> | <b>6.4% (551/8,642)</b> | <b>4(20,500)</b> | <b>0.79 [0.64, 0.96]</b> | <b>67%,<br/>p=0.01</b>  | <b>0.02</b>  |
| Ap,Riv,Ed (60mg),Da (150, 100 mg)           | <b>5.7% (560/9,852)</b>  | <b>6.4% (551/8,642)</b> | <b>4(18,494)</b> | <b>0.86 [0.75, 0.98]</b> | <b>25%,<br/>p=0.26</b>  | <b>0.03</b>  |
| Ap,Riv,Ed (30mg),Da (150, 100 mg)           | <b>5.2% (511/9,882)</b>  | <b>6.4% (551/8,642)</b> | <b>4(18,524)</b> | <b>0.77 [0.60, 1.00]</b> | <b>77%,<br/>p=0.002</b> | <b>0.05</b>  |
| Ap,Riv,Ed (60mg),Da (150 mg)                | 5.7% (495/8,657)         | 6.4% (551/8,642)        | 4(17,299)        | 0.90 [0.78, 1.02]        | 18%                     | 0.10         |
| Ap,Riv,Ed (60mg),Da (110 mg)                | <b>5.3% (458/8,619)</b>  | <b>6.4% (551/8,642)</b> | <b>4(17,261)</b> | <b>0.82 [0.71, 0.95]</b> | <b>27%,<br/>p=0.25</b>  | <b>0.009</b> |
| Ap,Riv,Ed (30mg),Da (150 mg)                | 5.1% (446/8,687)         | 6.4% (551/8,642)        | 4(17,329)        | 0.79 [0.59, 1.07]        | 83%,<br>p=0.0005        | 0.14         |
| Ap,Riv,Ed (30mg),Da (110 mg)                | <b>4.7% (409/8,649)</b>  | <b>6.4% (551/8,642)</b> | <b>4(17,291)</b> | <b>0.72 [0.55, 0.95]</b> | <b>78%,<br/>p=0.003</b> | <b>0.02</b>  |
| Xa inhibitors                               | 5.1% (482/9,430)         | 6.1% (456/7,447)        | 3(16,877)        | 0.76 [0.59, 0.98]        | 74%,<br>p=0.009         | 0.03         |
| Xa inhibitors<br>Ap,Riv,Ed 60mg             | <b>5.3% (393/7,424)</b>  | <b>6.1% (456/7,447)</b> | <b>3(14,871)</b> | <b>0.86 [0.75, 0.99]</b> | <b>9%,<br/>p=0.33</b>   | <b>0.04</b>  |
| Xa inhibitors<br>Ap,Riv,Ed 30mg             | 4.6% (344/7,454)         | 6.1% (456/7,447)        | 3(14,901)        | 0.73 [0.51, 1.05]        | 85%,<br>p=0.001         | 0.09         |

a: Data not reported on Apixaban, Edoxaban and Dabigatran; e: Data not reported on Rivaroxaban and Edoxaban; Ap,Riv,Ed, Da (150 mg): Apixaban, Rivaroxaban or Edoxaban, Dabigatran 150 mg; Ap,Riv,Ed, Da (110 mg): Apixaban, Rivaroxaban or Edoxaban, Dabigatran 110 mg; CI: Confidence interval; I<sup>2</sup>, p: Heterogeneity; n: Number of studies; N: Number of patients; NA: Not applicable; NR: Not reported; p: Statistical significance value; RR: Risk Ratio; Xa inhibitors: Apixaban, Rivaroxaban or Edoxaban.

### 5.3: Medical treatment in patients with renal failure

**eTable 6: Effect of NOAC compared to warfarin in patients with AF and renal failure (indirect evidence for patients with a previous stroke or TIA)**

| Outcome                             | Incidence (%)     |                   | n (N)      | RR [95% CI]       | I <sup>2</sup> , p | P value |
|-------------------------------------|-------------------|-------------------|------------|-------------------|--------------------|---------|
|                                     | NOAC              | Warfarin          |            |                   |                    |         |
| <b>Stroke or thromboembolism</b>    |                   |                   |            |                   |                    |         |
| Mild RF                             | 2.6% (255/9,968)  | 3.3% (235/7,162)  | 3 (17,130) | 0.73 [0.56, 0.97] | 48%,<br>p=0.12     | 0.03    |
| Moderate RF                         | 4.5% (373/8,258)  | 4.7% (264/5,622)  | 5 (13,880) | 0.87 [0.74, 1.04] | 13%,<br>p=0.33     | 0.13    |
| <b>Major bleeding complications</b> |                   |                   |            |                   |                    |         |
| Mild RF                             | 5.3% (503/9,472)  | 6.1% (408/6,668)  | 2 (16,140) | 0.82 [0.72, 0.93] | 0%,<br>p=0.51      | 0.002   |
| Moderate RF                         | 6.7% (540/8,101)  | 8.4% (459/5,473)  | 4 (13,574) | 0.73 [0.54, 0.99] | 83%,<br>p<0.0001   | 0.04    |
| <b>Death</b>                        |                   |                   |            |                   |                    |         |
| Mild RF                             | 6.5% (617/9,472)  | 7.4% (495/6,668)  | 2 (16,140) | 0.85 [0.73, 0.99] | 42%,<br>p=0.18     | 0.04    |
| Moderate RF                         | 14.6% (774/5,302) | 16.6% (664/3,997) | 3 (9,299)  | 0.93 [0.80, 1.07] | 50%,<br>p=0.11     | 0.32    |

CI: Confidence interval; I<sup>2</sup>, p: Heterogeneity; n: Number of studies; N: Number of patients; p: Statistical significance value; RR: Risk Ratio

**eFigure 15. Effect of NOAC compared to warfarin in patients with AF and mild/moderate renal failure on stroke and or thromboembolism (indirect evidence for patients with a previous stroke or TIA)**

**Creatinine clearance 50-80 ml/min**

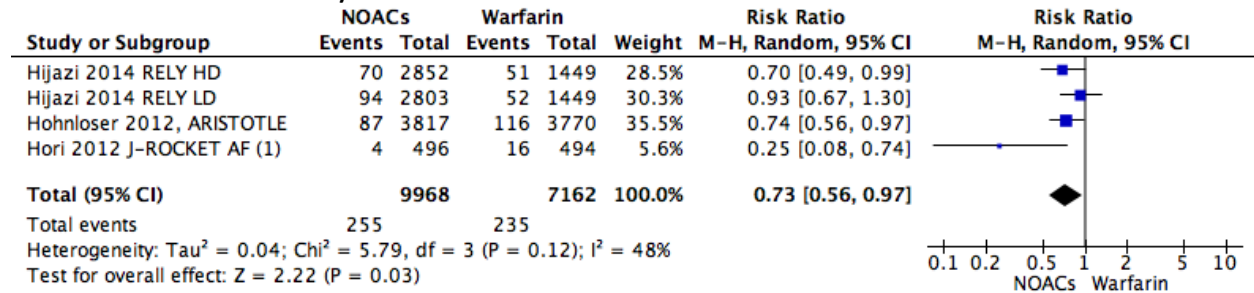

(1) Creatinine clearance > 50 ml/min

**Creatinine clearance < 50 ml/min**

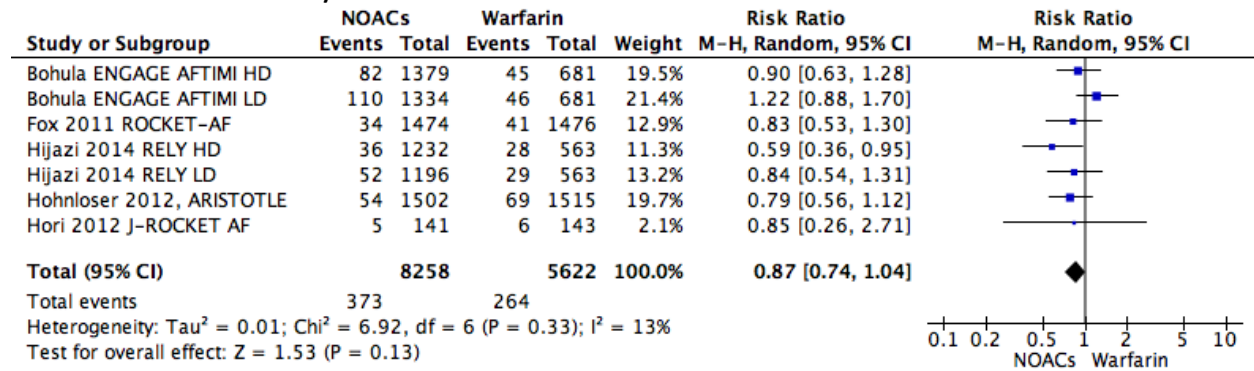

**eFigure 16. Effect of NOAC compared to warfarin in patients with AF and mild/moderate renal failure on major bleeding complications (indirect evidence for patients with a previous stroke or TIA)**

**Creatinine clearance 50-80 ml/min**

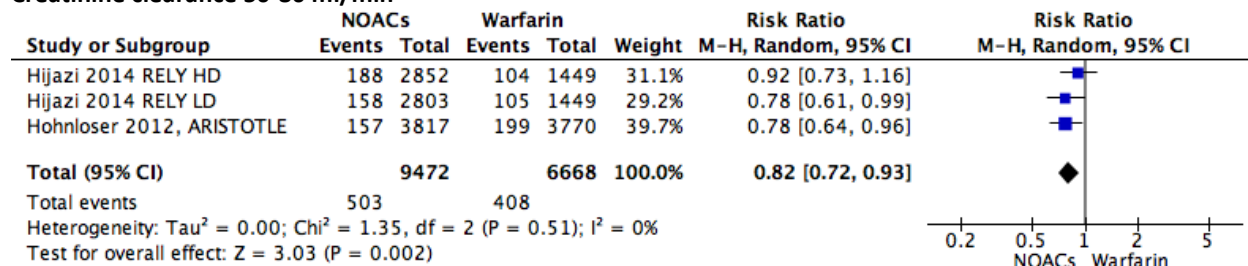

**Creatinine clearance < 50 ml/min**

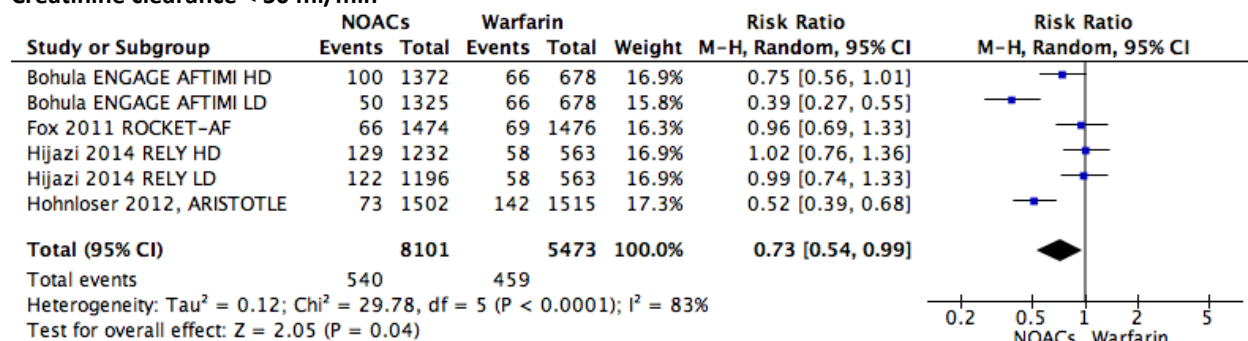



**eFigure 17. Effect of NOAC compared to warfarin in patients with AF and mild/moderate renal failure on all-cause mortality (indirect evidence for patients with a previous stroke or TIA)**

**Creatinine clearance 50-80 ml/min**

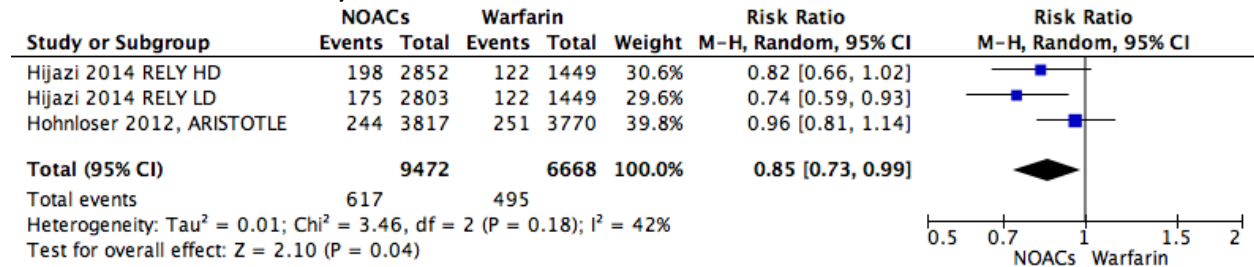

**Creatinine clearance < 50 ml/min**

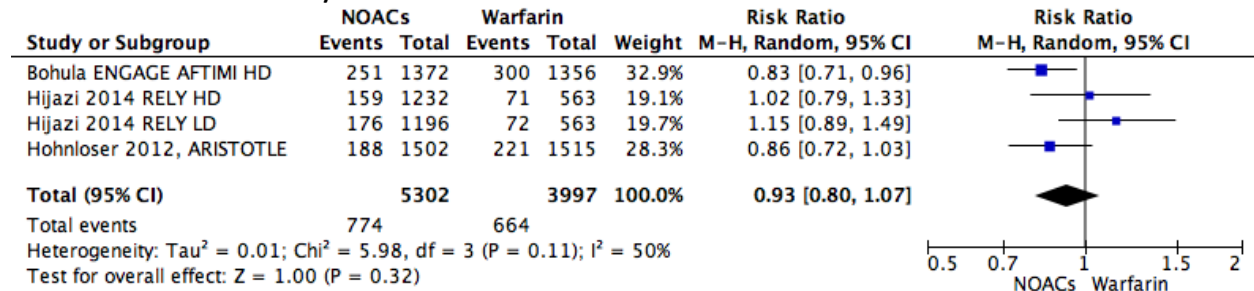

Supplement: Supplemental_Material.pdf [file Supplemental_Material.pdf]
